## Contribution to the Themed Section: 'Marine Aquaculture in the Anthropocene' Original Article

# Carbonate chemistry dynamics in shellfish farming areas along the Chilean coast: natural ranges and biological implications

Luisa M. Saavedra <sup>1,2\*</sup>, Gonzalo S. Saldías<sup>2,3,4</sup>, Bernardo R. Broitman<sup>2,5</sup>, and Cristian A. Vargas <sup>1,2,6</sup>

<sup>1</sup>Coastal Ecosystem & Global Environmental Change Lab (ECCA Lab), Department of Aquatic Systems and EULA Environmental Science Center, Faculty of Environmental Sciences, Universidad de Concepción, Concepción, Chile

<sup>2</sup>Center for the Study of Multiple-Drivers on Marine Socio-Ecological Systems (MUSELS), Universidad de Concepción, Concepción, Chile

<sup>3</sup>Departamento de Física, Facultad de Ciencias, Universidad del Bío-Bío, Concepción, Chile

<sup>4</sup>Centro FONDAP de Investigación en Dinámica de Ecosistemas Marinos de Altas Latitudes (IDEAL), Valdivia, Chile

<sup>5</sup>Departamento de Ciencias, Facultad de Artes Liberales & Bioengineering Innovation Center, Facultad de Ingeniería y Ciencias, Universidad Adolfo Ibáñez, Viña del Mar, Chile

<sup>6</sup>Millennium Institute of Oceanography (IMO), Universidad de Concepción, Concepción, Chile

\*Corresponding author: tel: +56 41 2661204; e-mail: [lu.saavedra07@gmail.com](mailto:lu.saavedra07@gmail.com).

Saavedra, L. M., Saldías, G. S., Broitman, B. R., and Vargas, C. A. Carbonate chemistry dynamics in shellfish farming areas along the Chilean coast: natural ranges and biological implications. – ICES Journal of Marine Science, 78: 323–339.

Received 29 December 2019; revised 12 June 2020; accepted 26 June 2020; advance access publication 7 September 2020.

The increasing shellfish aquaculture requires knowledge about nearshore environmental variability to manage sustainably and create climate change adaptation strategies. We used data from mooring time series and *in situ* sampling to characterize oceanographic and carbonate system variability in three bivalve aquaculture areas located along a latitudinal gradient off the Humboldt Current System. Our results showed  $\text{pH}_T < 8$  in most coastal sites and occasionally below 7.5 during austral spring–summer in the lower ( $-30^\circ\text{S}$ ) and central ( $-37^\circ\text{S}$ ) latitudes, related to upwelling. Farmed mussels were exposed to undersaturated ( $\Omega_{\text{arag}} < 1$ ) and hypoxic ( $< 2 \text{ ml l}^{-1}$ ) waters during warm seasons at  $-37^\circ\text{S}$ , while in the higher latitude ( $43^\circ\text{S}$ ) undersaturated waters were only detected during colder seasons, associated with freshwater runoff. We suggest that both *Argopecten purpuratus* farmed at  $-30^\circ\text{S}$  and *Mytilus chilensis* farmed at  $-43^\circ\text{S}$  may enhance their growth during summer due to higher temperatures, lower  $\text{pCO}_2$ , and oversaturated waters. In contrast, *Mytilus galloprovincialis* farmed at  $37^\circ\text{S}$  grows better during spring–summer, following higher temperatures and high  $\text{pCO}_2$ . This knowledge is relevant for aquaculture, but it must be improved using high-resolution time series and *in situ* experimentation with farmed species to aid their adaptation to climate change and ocean acidification.

**Keywords:** bivalve aquaculture, carbonate system, climate change, nearshore, variability

## Introduction

In the future, aquaculture is set to become the largest source of marine protein worldwide; it currently provides nearly half of the seafood intended for human consumption (Gentry *et al.*, 2017; FAO, 2018). This explosive growth is fuelled by the aquaculture of non-feed animals, chiefly shellfish bivalves such as mussels, scallops, and clams, which has grown exponentially around the

world over the past three decades (FAO, 2018). This type of growth is based on the low technical barriers for shellfish farming and the increasing need for healthy and low-cost protein sources (Lovatelli *et al.*, 2008). Chile is among the top 5 global producers of shellfish, a trend that has been bolstered by the rapid development of bivalve aquaculture since the 1990s (FAO, 2018). The main farmed species include the northern scallop *Argopecten*

*purpuratus*, which is farmed in protected embayments along the arid-semiarid northern coast of Chile (Thiel et al., 2007), and the Chilean mussel *Mytilus chilensis* in the southern fjord systems (Fernández et al., 2018; San Martín et al., 2019). A small-scale mussel farming area is also present along the wave-exposed central coastline (Mesas and Tarifeño, 2015), where the main cultured species is *Mytilus galloprovincialis* (Ruiz et al., 2008).

Until 2017 Chilean aquaculture was based mostly on salmonid production, corresponding to 54% of the total weight, yet molluscs also played an important role with 31% of the total production (Fernández et al., 2018; Sernapesca, 2018). Chile has become one of the largest producers of farmed mussels around the world and number one in exportation, with ~300 000 tonnes of mussels produced in 2017 (FAO, 2018; Fernández et al., 2018). The rapid development of mussel aquaculture is reflected by the increase from 24 000 to 300 000 tonnes in the last 10 years, while scallop production has decreased from 19 000 to 3500 tonnes, recovering slightly after the 2016 El Niño event (Sernapesca, 2000–2016, see inset of Figure 1). Mussel aquaculture production currently relies

on the collection of wild larvae in nearshore areas located close to shellfish farming areas; thus, they are highly sensitive to changes in seawater conditions and other environmental processes, which have affected production in the past (Lara et al., 2016). In contrast, scallop aquaculture can supplement seed stock with larvae produced in hatcheries, where environmental conditions are more controlled; later juveniles are grown in nearshore rafts (Von Brand et al., 2016).

Bivalve aquaculture is carried out at specific locations spanning different ocean conditions that may shift as global and climate change proceeds, thus impairing the expansion of sustainable aquaculture (Broitman et al., 2017; Froehlich et al., 2018). Coastal regions extending along broad latitudinal gradients such as the Chilean coastal system exhibit environmental variation (Montecino et al., 2002; Wieters et al., 2003; Iriarte et al., 2007; Lara et al., 2016; Vargas et al., 2017; Narváez et al., 2019). For instance, major changes in salinity and pH/pCO<sub>2</sub> are observed in river plumes and/or river-influenced coastal areas due to variable freshwater influx (Pérez et al., 2015; Vargas et al., 2016), whereas

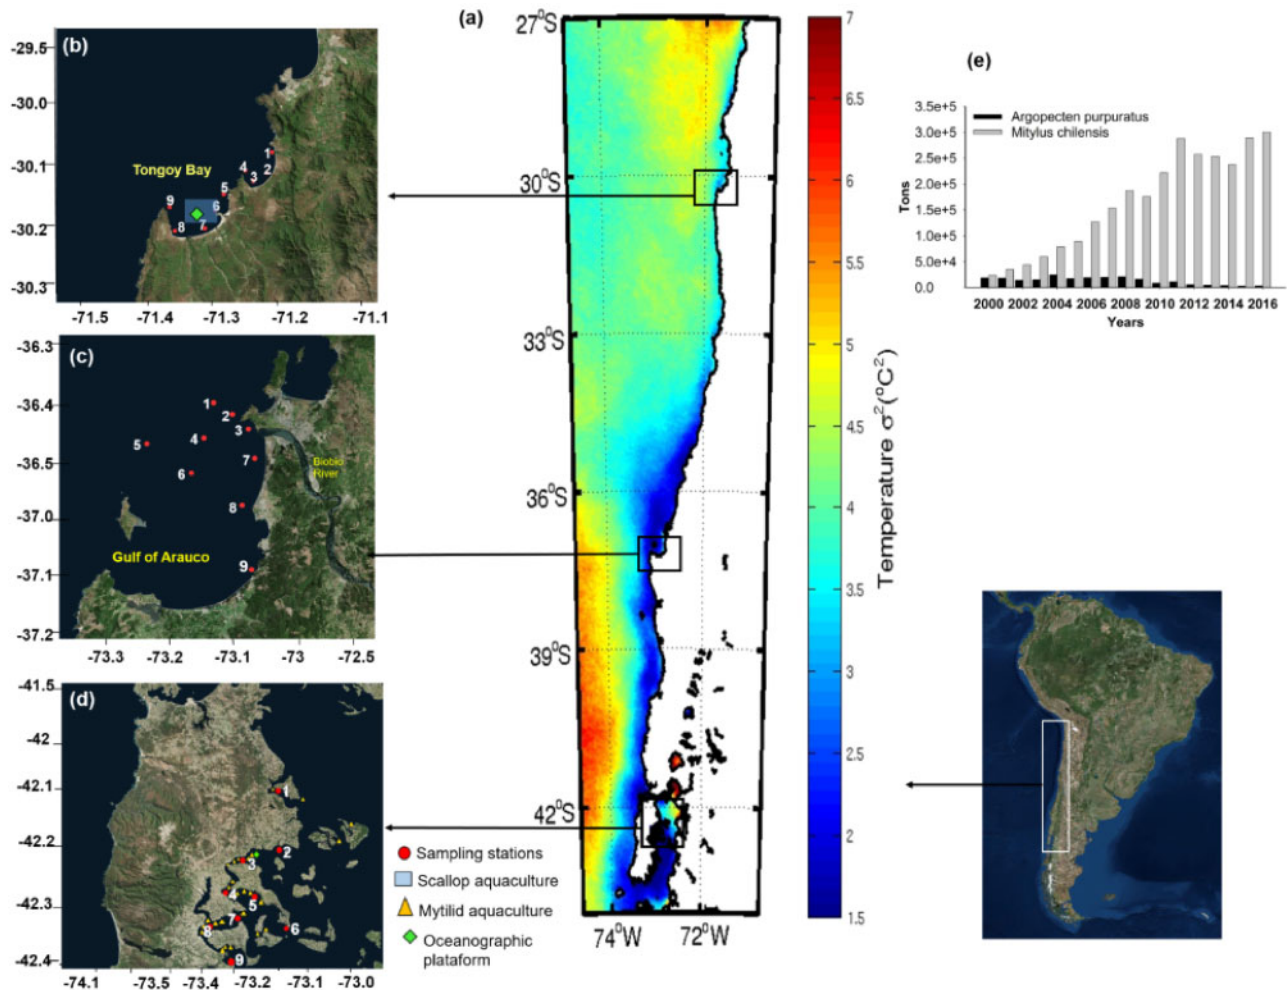

**Figure 1.** Geographic location of study areas along the Chilean coast, showing (a) variation of sea surface temperature and the locations of sampling stations for (b) Tongoy and Guanaqueros Bay (northern area); (c) Arauco Gulf (central area); and (d) Chiloe island (southern area). Sampling sites are shown by red dots, while scallop aquaculture areas are marked with a light blue square and mytilid aquaculture centres are shown by yellow triangles. The locations of the oceanographic platforms are marked with green diamonds in (b) and (d). The last decade trends in scallop (*A. purpuratus*) and Chilean mussel (*Mytilus edulis chilensis*) production are shown in (e) and were obtained from the national aquaculture production data (Sernapesca, 2000–2016).

temperature, oxygen, total chlorophyll and pH/ $p\text{CO}_2$  can vary dramatically during episodic events of coastal upwelling (Torres and Ampuero, 2009; Vargas *et al.*, 2016; Vargas *et al.*, 2017). Consequently, shellfish farming areas along the Chilean coast will be affected by intensified environmental conditions of both the average and variability of environmental conditions, especially in carbonate chemistry (i.e. pH,  $p\text{CO}_2$  and the saturation state of calcium carbonate  $\Omega_{\text{arag}}$ ) (Yáñez *et al.*, 2017; Ramajo *et al.*, 2019).

Adequate characterization of coastal carbonate system variability is challenging, mostly due to the complex spatial and temporal variability and multiple physical, chemical, and biological drivers occurring in this coastal domain (Vargas *et al.*, 2016). It is also critically important due to the well-known effects on shellfish physiology and their implications for aquaculture production (Gazeau *et al.*, 2013; Barton *et al.*, 2015; Waldbusser *et al.*, 2015b; Navarro *et al.*, 2016; Clements and Chopin, 2017; Fitzer *et al.*, 2018). This is especially relevant in upwelling regions such as California and north-central Chile, where more acidic upwelling waters may affect bivalve larvae growth and development (Barton *et al.*, 2015; Vargas *et al.*, 2017); the low carbonate saturation state ( $\Omega_{\text{arag}} < 1$ ) is mainly responsible for these effects (Waldbusser *et al.*, 2015b). Recent studies in Chile reported the impact of low pH/high  $p\text{CO}_2$  levels on mussel and scallop physiology. Lagos *et al.* (2016) shows that low pH/ $p\text{CO}_2$  conditions may increase shell dissolution, thus compromising scallop growth. Nevertheless, some marine calcifiers exhibit mechanisms to cope with low pH/high  $p\text{CO}_2$  conditions (Thomsen and Melzner, 2010; Thomsen *et al.*, 2010), and recent evidence shows that factors such as high food availability and temperature can mitigate the negative effects of low pH conditions on different physiological traits (Thomsen *et al.*, 2013; Ramajo *et al.*, 2016). Thus, the impact of ocean acidification (OA) on the shellfish industry is modulated by other environmental variables, such as temperature, oxygen, and food supply; in high productive upwelling regions, many stressors may be present at the same time, such as hypoxia and low pH due to increased  $p\text{CO}_2$  from respiration (Melzner *et al.*, 2013). However, local adaptation of shellfish may occur in this coastal zone as demonstrated recently by Ramajo *et al.* (2019), who show that *A. purpuratus* could be acclimated to short-term colder, acidic and hypoxic conditions in northern Chile.

The temporal persistence of spatially structured patterns of environmental variability is a key driver for potential adaptation through the selection of genotypes that are resilient to the local combinations of multiple stressors (Ramajo *et al.*, 2013; Lardies *et al.*, 2014; Duarte *et al.*, 2015; Osorio *et al.*, 2017; Vargas *et al.*, 2017; Fitzer *et al.*, 2018). Comprehensive characterization of the natural temporal variability in the carbonate chemistry of shellfish farming areas is necessary to link OA experiments with aquaculture species in present and potential future organismal performance. Here, we established the patterns of temporal variability in environmental conditions (temperature, salinity, oxygen and food supply) and changes in the carbonate system chemistry along a wide latitudinal range characterized by contrasting oceanographic drivers (e.g. river plumes, tidal inlets, coastal upwelling areas) where the main cluster of shellfish aquaculture is carried out in southern Chile. Based on these comprehensive analyses, we also discuss the potential implications of natural environmental variability in local adaptation processes and the increasing resilience of farmed species to future environmental change.

## Methodology

### Study areas

The present study focused on three main geographic areas (spanning a 1500-km latitudinal gradient) that concentrate most of the Chilean shellfish aquaculture. Scallop aquaculture (*A. purpuratus*) is mostly carried out in Tongoy Bay, located on the coast of northern-central Chile (30°12'S, 71°34'W, Figure 1b). This embayment is sheltered by Punta Lengua de Vaca, a major upwelling centre with high coastal productivity (Bravo *et al.*, 2016). It is typically characterized by cold,  $\text{CO}_2$ -saturated, and poorly oxygenated waters, particularly during spring and summer (Thiel *et al.*, 2007; Torres and Ampuero, 2009). Upwelling waters are transported towards the inner shelf during austral spring and summer in response to the anticyclonic wind stress curl caused by seasonally weaker trade winds off the coast (Torres *et al.*, 2011; Gallardo *et al.*, 2017; Aguilera *et al.*, 2018). Monitoring was performed through 1- or 2-day shipboard campaigns per season, including two depths, spread over nine nearshore stations (Figure 1), and hourly automatic measurements from oceanographic sensors on a moored buoy placed in Tongoy Bay (Figure 1 and Table 1).

The Arauco Gulf in south-central Chile is a second shellfish farming area where a small-scale mussel farming industry is currently being developed. It is mostly based on the mussel *M. galloprovincialis*, located in a river-influenced upwelling area inside the Arauco Gulf (37°10'–36°45'S, 73°W, Figure 1c). The Arauco Gulf is a large, sheltered embayment (ca. 40 km) characterized by a marked change in the general orientation of the coastline from N–S to E–W, with a relatively smooth bathymetry and the presence of the Biobío River Canyon (Sobarzo *et al.*, 2016). The open coastal zone adjacent to the gulf, on the left of Punta Lavapié, is exposed to intense seasonal upwelling events, mostly during spring/summer (Sobarzo and Djurfeldt, 2004), when low pH/high  $p\text{CO}_2$  waters prevail over the continental shelf driven by both upwelling and freshwater discharge from the Biobío River, which drains into the northern edge of the gulf (Vargas *et al.*, 2016). During winter months the Biobío River plume typically flows south into the Arauco Gulf (Saldías *et al.*, 2012). Monitoring in this coastal zone consisted of bi-monthly shipboard sampling (15 days each) of one nearshore station (St 9, Figure 1 and Table 1) adjacent to a small-scale mussel aquaculture operation. We also included two daily field campaigns involving nine nearshore stations during spring and summer (Figure 1 and Table 1).

Finally, the main cluster of the mussel farming industry in Chile is located in the southern region, mainly in the Inner Sea of Chiloé, and is focused on *M. chilensis* (Fernández *et al.*, 2018; San Martín *et al.*, 2019). The Inner Sea of Chiloé (42–44°S) is characterized by high seasonality with higher temperatures during summer ( $\sim 18^\circ\text{C}$ ) and minimal values during winter ( $9^\circ\text{C}$ ). A clear vertical salinity distribution is generated over its eastern side due to the freshwater runoff from small rivers during summer (Iriarte *et al.*, 2007). Surface waters in the southern portion of the coastline ( $>37^\circ\text{S}$ ) are relatively brackish and more oxygenated because of the influence of large freshwater runoff from snowmelt and icefields, with lower levels of inorganic carbon; they are strongly undersaturated in  $\text{CO}_2$  and depleted in nitrate (Torres *et al.*, 2011). Despite our knowledge of undersaturation of  $\text{CO}_2$  in southern coastal waters, there is no information about the carbonate system parameters (Omega aragonite and calcite)

**Table 1.** Summary of oceanographic observations including time series from buoys and conventional shipboard sampling.

| Location               | Period                         |                                   |                                    |     | Type                  | Frequency               | Stations (n) | Depth (m)       | Measurements                                               | Sensors               |
|------------------------|--------------------------------|-----------------------------------|------------------------------------|-----|-----------------------|-------------------------|--------------|-----------------|------------------------------------------------------------|-----------------------|
|                        | Coordinates                    | Start                             | Finish                             | End |                       |                         |              |                 |                                                            |                       |
| Tongoy Bay             | -30°16'30.27",<br>-71°33'41.7" | 15 July 2015                      | 12 March 2018                      |     | Buoy                  | Hourly                  | 1            | 8–10            | T°, Sal, O <sub>2</sub> ,<br>Chl-total, pH <sub>T</sub>    | WQM and<br>SeaFet     |
| Arauco Gulf            | -37°09'32.4",<br>-73°11'32.5"  | 10 December<br>2014               | 22 May 2016                        |     | Shipboard<br>sampling | Seasonally <sup>a</sup> | 9            | 2 and 8         | T°, Sal, O <sub>2</sub> ,<br>Chl-total, pH, A <sub>T</sub> | CTD, water<br>samples |
|                        |                                | 8 April 2015                      | 4 April 2017                       |     | Shipboard<br>sampling | Bi-monthly              | 1            | 2, 5,<br>and 10 | T°, Sal, O <sub>2</sub> , Chl-total,<br>pH, A <sub>T</sub> | CTD, water<br>samples |
| Inner Sea<br>of Chiloé | -42°21'55.8"S,<br>-73°34'59.8" | 14 September<br>2015              | 14 September<br>2015               |     | Shipboard<br>sampling | daily                   | 9            | 2 and 10        | T°, Sal, O <sub>2</sub> , Chl-total,<br>pH, A <sub>T</sub> | CTD, water<br>samples |
|                        |                                | 20 January 2016<br>11 August 2015 | 20 January 2016<br>22 October 2017 |     | Buoy                  | hourly                  | 1            | 4               | T°, Sal, O <sub>2</sub> , Chl-total,<br>pH <sub>T</sub>    | WQM and<br>SeaFet     |
|                        |                                | 8 July 2014                       | 28 April 2016                      |     | Shipboard<br>sampling | Seasonally <sup>a</sup> | 9            | 2 and 8         | T°, Sal, O <sub>2</sub> , Chl-total,<br>pH, A <sub>T</sub> | CTD, water<br>samples |

<sup>a</sup>Seasonal sampling corresponds to a 1-day campaign per season. The field work involved nine stations where water samples were taken at two depths (with a replicate at each depth level).

in the Inner Sea of Chiloé to date. Monitoring of this nearshore zone was carried out through seasonal daily shipboard campaigns including two depths at nine stations and hourly automatic measurements from a moored buoy located at one of the mussel farming sites (near St 3, Figure 1 and Table 1).

### Water sampling and hydrography

The hydrographic and chemical seawater characterization was performed using two methodological approaches: (i) manual sampling campaigns at different stations in the three major shellfish farming sites and nearby areas and (ii) automatic high-frequency records using oceanographic buoys in two coastal zones (Tongoy Bay and the Inner Sea of Chiloé, Chiloé hereafter). The details of the dates of each campaigns are presented in Table 1.

Temperature, salinity, and oxygen concentration were measured in shipboard sampling campaigns using a SeaBird SBE-19plus conductivity–temperature–depth (CTD) profiler equipped with a Westar fluorimeter. Water samples for total chlorophyll, total alkalinity (A<sub>T</sub>), pH<sub>T</sub> and nutrients [silicic acid (Si(OH)<sub>4</sub>), nitrate (NO<sub>3</sub><sup>-</sup>), nitrite (NO<sub>2</sub><sup>-</sup>) and orthophosphate (PO<sub>4</sub><sup>3-</sup>)] were collected in surface and subsurface waters using 5 l Niskin bottles. Samples for nutrient analyses were filtered through GF/F glass fibre filters (47 mm diameter) and frozen at -20°C until analysis in the laboratory. Depth levels were selected based on the arrangement of aquaculture systems in shellfish farming areas of each region (Table 1).

In addition to seasonal characterization of the carbonate system through field sampling campaigns (Figure 1b and d), we used information from 3-year time series obtained from oceanographic buoys deployed in two of the major shellfish aquaculture areas: Tongoy Bay (Figure 1b) and Chiloé (Figure 1d). Time series were available from August 2015 to November 2017. These oceanographic buoys are specifically designed to collect information for the shellfish farming industry (CEAZA and MUSELS Research Centre). As a consequence, the oceanographic buoy arrangements and sensor depths were based on the vertical distribution of shellfish culture systems: 8–10 m in Tongoy and 4 m in Chiloé. Continuous records of temperature, salinity, total chlorophyll fluorescence, dissolved oxygen (DO), and pH were obtained with a Seabird Water Quality Monitor (WQM) and a Satlantic SeaFET (Figure 1d). The SeaFET pH (ISFET pH sensor) measurements were corrected by temperature (both recorded by the WQM) using the equations from Martz *et al.* (2010). This correction indicated differences no greater than 10<sup>-13</sup> between corrected and uncorrected pH data.

### Chemical analyses and estimation of other carbonate system parameters

Subsamples for total chlorophyll concentration estimates were extracted in the dark with 95% acetone (Parsons *et al.*, 1984) and measured in a Turner Design TD-700 fluorimeter. NO<sub>3</sub><sup>-</sup>, NO<sub>2</sub><sup>-</sup>, and PO<sub>4</sub><sup>3-</sup> concentrations were determined via spectrophotometry following Parsons *et al.* (1984) and Murphy and Riley (1962). Si(OH)<sub>4</sub> concentrations were determined following Koroleff (1972). The protocols for A<sub>T</sub> and pH<sub>T</sub> estimates were conducted following the Guide for Best Practices for Ocean pCO<sub>2</sub> Measurements (Dickson *et al.*, 2007) and EPOCA Guide (Riebesell *et al.*, 2010). pH<sub>T</sub> samples were collected in 50-ml syringes, immediately transferred to a 25-ml thermostatted cell at

25.0 ± 0.1°C for standardization with a Metrohm® pH meter using a glass combined double junction Aquatrode plus Pt 1000, and measured at total scale (pH<sub>T</sub>) using a calibrated Tris buffer at 25 ± 0.1°C (pH = 8.089).

Samples for A<sub>T</sub> were poisoned with 50 µl of saturated HgCl<sub>2</sub> solution and stored in 250-ml borosilicate BOD bottles with ground-glass stoppers lightly coated with Apiezon L® grease and kept in darkness at room temperature. A<sub>T</sub> was determined using the open-cell titration method (Dickson *et al.*, 2007), with an automated Alkalinity Titrator (Model AS-ALK2 Apollo SciTech). The AS-ALK2 system is equipped with a combination of pH electrode (8102BNUWP; Thermo Scientific, USA) and temperature probe for temperature control (Star ATC probe; Thermo Scientific) connected to a pH meter (Orion Star A211 pH meter; Thermo Scientific). All samples were analysed at 25°C (±0.1°C) with temperature regulation using a water bath (Lab Companion CW-05G). The accuracy was controlled against a certified reference material (supplied by Andrew Dickson; Scripps Institution of Oceanography, San Diego, CA, USA); A<sub>T</sub> repeatability averaged 2–3 µmol kg<sup>-1</sup>. Temperature and salinity data were used to calculate the remaining carbonate system parameters (pCO<sub>2</sub>, CO<sub>3</sub><sup>2-</sup>) and the Aragonite saturation state (Ω<sub>arag</sub>). Analyses were performed using CO<sub>2</sub>SYS software for MS Excel (Pierrot *et al.*, 2006) set with Mehrbach solubility constants (Mehrbach *et al.*, 1973), refitted by Dickson and Millero (1987). The KHSO<sub>4</sub> equilibrium constant determined by Dickson (1990) was used for all calculations.

To estimate the parameters of the carbonate system from the oceanographic buoys deployed in Tongoy and Chiloé, we established an empirical relationship between A<sub>T</sub> and discrete salinity to create an estimated total alkalinity (e A<sub>T</sub>) time series (Jiang *et al.*, 2014; Fassbender *et al.*, 2017). The relationship for the Chiloé oceanographic buoy was built using monthly parallel samples of A<sub>T</sub> and salinity in the same place as the buoy, from which a strong statistical relationship was obtained [A<sub>T</sub> (µmol/kg) = 43.9 SAL + 799.7, R<sup>2</sup> = 0.97, p < 0.05]. This is in accordance with the linear regression described by Alarcón *et al.* (2015) in a nearby area. For Tongoy Bay, we used the carbonate system parameters published by Vargas *et al.* (2017). Time series of temperature, pH<sub>T</sub> and e A<sub>T</sub>, together with inorganic nutrient data, were used in the CO<sub>2</sub>SYS programme to calculate partial pressure of CO<sub>2</sub> (pCO<sub>2</sub>) and aragonite saturation state (Ω<sub>Arar</sub>), using the methodology described above.

A time series analysis of wind intensity and direction was also included in addition to hydrographic data and chemical analysis. Wind data were obtained from meteorological stations located near two of our study sites: Tongoy Bay (Punta Lengua de Vaca upwelling centre) and the Arauco Gulf (Punta Lavapie upwelling centre). Time series involved a period ranging from August 2015 to March 2017 in Punta Lengua de Vaca and between June 2015 and February 2016 in Punta Lavapie.

## Data analysis

We tested for differences in average seasonal conditions and carbonate system parameters between the three locations using two-way ANOVA and Tukey's test for multiple comparisons to assess differences between aquaculture areas. To examine the dominant cycles of the temporal variability in environmental variables, a power spectral density (PSD) analysis was performed using the Fast Fourier Transform approach (Emery and Thomson, 2004)

with the hourly time series of Tongoy Bay and Chiloé. The time series were previously filtered to remove low-frequency fluctuations (cycles >6 months) and to enhance the high-frequency variability shown in Figure 3. Spectral analysis is commonly used to separate or partition the variance of a time series at different frequencies. It is a powerful data analysis method to identify dominant frequencies and periods of variability in a time series. The quantification of the variance is expressed in the y-axis with units of variance (squares of the variable being analysed) over units of frequency (e.g. cycles per hour), which defines the PSD. For further details about PSD analysis, see Chapter 5.6 of Emery and Thomson (2004). From the wind time series at Tongoy Bay and the Arauco Gulf, Ekman Transport was calculated as an indicator of upwelling-favourable conditions.

## Results

### Sub-annual variability in shellfish farming areas

High-frequency variability was observed for temperature and oxygen in the northern site. All variables seemed to covary in phase over seasonal scales (Figure 2), and high-frequency variability was enhanced during spring–summer (Figure 2a and c). A PSD analysis of the hourly time series in Tongoy Bay and Chiloé showed energetic environmental variability taking place from a few days to ~30 days (Figure 3). There were common variability cycles over shorter periods for both locations, such as the diurnal and semi-diurnal cycles (Figure 3b and d), which are associated with the dominant tidal regimes. A 6–8-h variability pattern appeared in the pH in Chiloé; however, there is no clear evidence of a real process promoting such a cycle. At longer temporal scales, fluctuations ~7, 15, and 28–32 days appeared to dominate the intra-seasonal variability (Figure 3a and c), although other periods might also be important. The cycles of ~15 and 28–32 days were most likely associated with the spring-neap and apogee-perigee tidal cycles in Chiloé (Figure 3c).

### Seasonal variability in shellfish farming areas

The seasonal pattern across the study areas showed a clear latitudinal temperature gradient, with the highest mean temperature values in Tongoy Bay during summer and the lowest in Chiloé during winter (15.7 and 10.5°C, respectively, Table 2 and Figure 4a). Well-oxygenated waters (>4 ml l<sup>-1</sup>) were observed during the entire study period at the Chiloé site, whereas almost hypoxic waters (oxygen <2 ml l<sup>-1</sup>) (Díaz and Rosenberg, 1995) were observed in the Arauco Gulf and Tongoy Bay during spring–summer and winter–spring periods, respectively (Figure 4c). Maximum food availability for shellfish (represented by total chlorophyll concentration) was observed during the spring–summer periods at all sites; the highest chlorophyll concentration (>5 µg l<sup>-1</sup>) was observed in the Arauco Gulf (Figure 4b). Food availability was greater during the warm seasons (upwelling period) in Tongoy Bay and the Arauco Gulf and lower year-round in Chiloé (Tukey *post hoc* test, p < 0.001, Table 3 and Figure 4b).

Based on our time series, we observed clear differences in carbonate system parameters among the three shellfish farming areas (Table 3). pH<sub>T</sub> and oxygen showed a similar seasonal trend among sites (Figure 4d), and as expected, pCO<sub>2</sub> showed the opposite trend from pH<sub>T</sub>. Low pH/high pCO<sub>2</sub> waters occurred in northern Chile mainly during spring (Tukey *post hoc* test, p < 0.001), when nearshore waters reached maximum pCO<sub>2</sub> levels

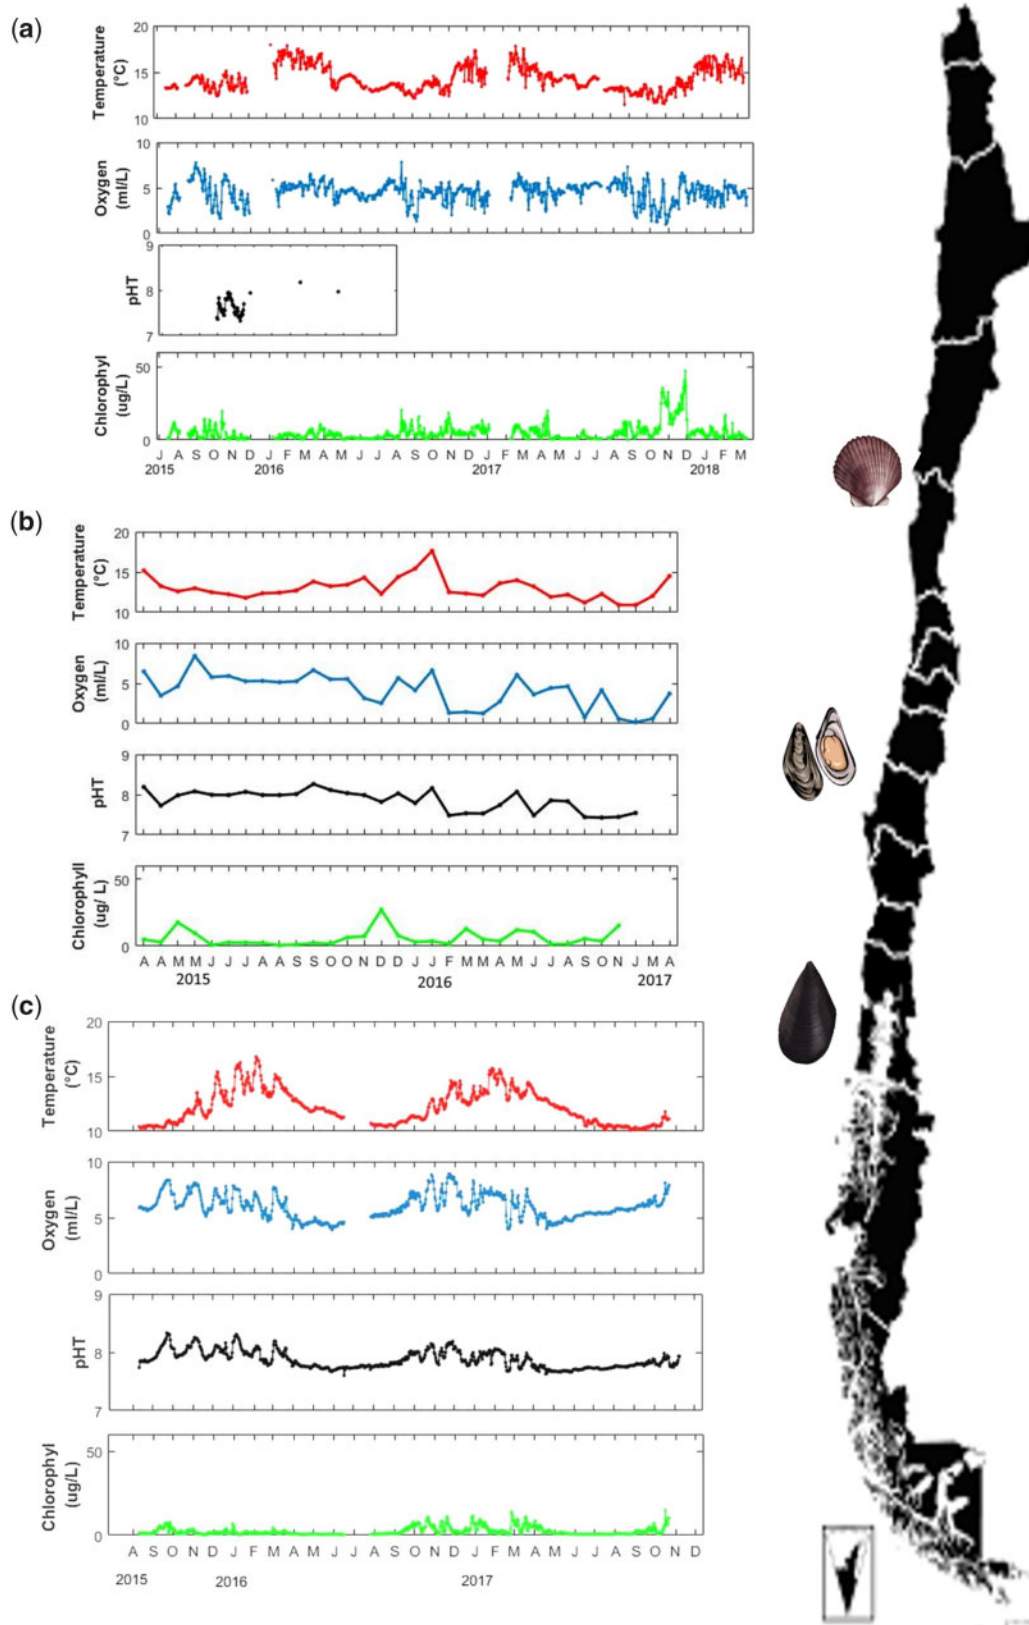

**Figure 2.** Time series of temperature, DO,  $\text{pH}_{\text{total}}$ , and total chlorophyll for (a) Tongoy Bay; (b) Arauco Gulf; and (c) Chiloé aquaculture zones off the Chilean coast. Time series were obtained by oceanographic buoys installed in the Tongoy Bay and Chiloé study areas, while data were obtained through shipboard bi-monthly sampling (more details in Methodology section) in the Arauco Gulf.

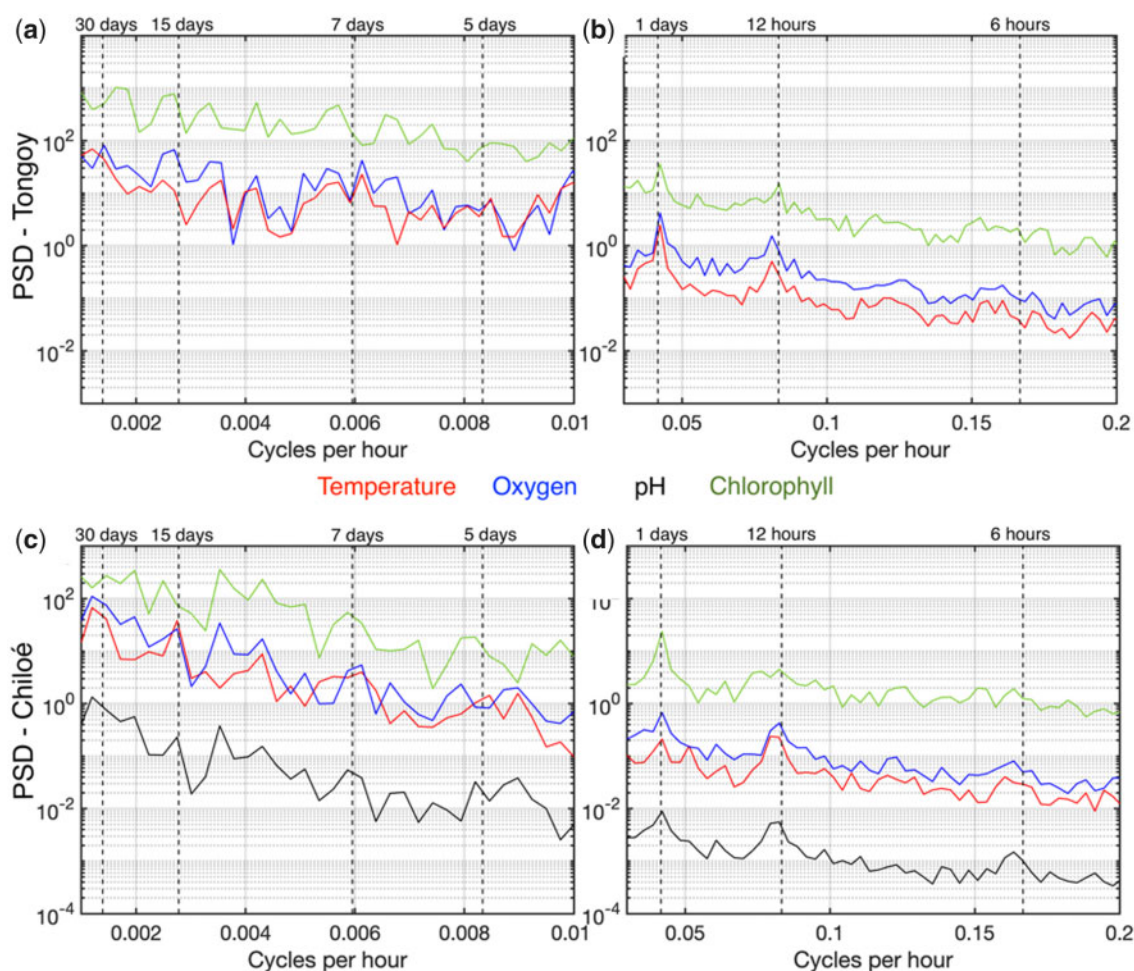

**Figure 3.** PSD analysis of the time series of temperature (red), oxygen (blue), pH (black), and chlorophyll (green) from (a and b) Tongoy Bay and (c and d) Chiloé. Vertical dashed lines are included to specify the period of some peaks in spectral energy, and as references for better visualization.

of 1726  $\mu\text{atm}$  and undersaturated conditions (Table 2). However,  $p\text{CO}_2$  showed the highest variability during spring, with daily alternation between high and low levels. Shellfish farming areas in Tongoy Bay were also subject to hypoxic waters ( $<2 \text{ ml l}^{-1}$ ) during coastal upwelling conditions, typically during spring. During these periods, DO reached values as low as  $1 \text{ ml l}^{-1}$  (Figure 2a), while normoxic ( $>4 \text{ ml l}^{-1}$ ) conditions occurred during the remaining part of the year (Figure 4c). In agreement with our observations, the Ekman transport analyses suggest upwelling-favourable conditions almost year-round off Punta Lengua de Vaca, with increased intensity from August and maximum transport during austral spring (September to November) (Supplementary material).

The Arauco Gulf site showed the lowest seasonal mean pH ( $\text{pH}_T \sim 7.78$ ) and the highest mean  $p\text{CO}_2$  ( $>800 \mu\text{atm}$ ) values, which were observed during austral spring and summer (Table 2 and Figure 4d). The lowest  $\text{pH}_T$  values of 7.410 and maximum  $p\text{CO}_2$  of 1923  $\mu\text{atm}$  were reached during some summer days (Figure 2b). The amplitude in the range of carbonate system parameters ( $p\text{CO}_2$ , pH and Omega aragonite) was higher than in the other study sites, which is apparent from the high standard deviation (SD) in the selected parameters (Figure 4d–f and

Table 2). Our study site in the Arauco Gulf shellfish farming area was also subject to hypoxic waters ( $<2 \text{ ml l}^{-1}$ ), reaching values  $<0.5 \text{ ml l}^{-1}$  during some days in spring and summer (Figures 2b and 4c), especially in deeper waters (10 m). Total chlorophyll values also reached the highest levels during spring and lowest during winter (Figure 4b). Ekman transport estimates at Punta Lavapie suggest more upwelling-favourable conditions during spring and summer, but the analyses show that upwelling events typically had short pulses ( $<5$  days) (Figure 1 and Supplementary material).

$\text{pH}_T$  followed a seasonal trend similar to both oxygen and total chlorophyll concentrations in Chiloé. In this mussel farming area, the lowest  $\text{pH}_T$  values were observed during autumn, reaching values  $<7.7$ , while  $p\text{CO}_2$  reached 1100  $\mu\text{atm}$  (Figure 4d and e). The clear seasonality of oceanographic parameters in the southern shellfish farming area was reflected by lower temperatures, oxygen and pH during the cold seasons (Figure 2c), and almost undersaturated waters during some days of winter and autumn ( $\Omega < 1.5$ ). In contrast to the sites located at lower latitude, shellfish cultured in this coastal zone were exposed to normoxic ( $>4 \text{ ml l}^{-1}$ ) conditions throughout the study period (Table 2 and Figures 2c and 4c), yet total chlorophyll concentrations were comparably lower

**Table 2.** Seasonal variability in temperature, salinity, oxygen, chlorophyll,  $p\text{CO}_2$ ,  $A_T$ , and  $\text{pH}_T$  (mean  $\pm$  SD) in the three coastal study zones: Tongoy (30°S), Gulf of Arauco (37°S), and Chiloé (42°S).

|        |                                     | Tongoy          | Arauco           | Chiloé           |
|--------|-------------------------------------|-----------------|------------------|------------------|
| Winter | <i>n</i>                            | 234             | 35               | 236              |
|        | Temperature (°C)                    | 13.37 $\pm$ 0.6 | 12.45 $\pm$ 0.3  | 10.4 $\pm$ 0.3   |
|        | Salinity                            | 34.3 $\pm$ 2.2  | 31.5 $\pm$ 2.7   | 32.6 $\pm$ 0.3   |
|        | Oxygen (mg l <sup>-1</sup> )        | 4.8 $\pm$ 1.3   | 5.03 $\pm$ 1.2   | 5.7 $\pm$ 0.6    |
|        | Chlorophyll (mg C l <sup>-1</sup> ) | 4.5 $\pm$ 3.7   | 3 $\pm$ 2.7      | 1.3 $\pm$ 1.2    |
|        | <i>n</i>                            | 9               | 23               | 144              |
|        | $p\text{CO}_2$ ( $\mu\text{atm}$ )  | 530 $\pm$ 176   | 605 $\pm$ 406    | 609 $\pm$ 192    |
|        | $A_T$ ( $\mu\text{mol/kg}$ )        | 2 248 $\pm$ 6.3 | 2 118 $\pm$ 147  | 2 238 $\pm$ 18.6 |
|        | pH                                  | 7.95 $\pm$ 0.1  | 7.92 $\pm$ 0.19  | 7.85 $\pm$ 0.1   |
|        | $\Omega_{\text{arag}}$              | 1.87 $\pm$ 0.4  | 1.57 $\pm$ 0.5   | 1.3 $\pm$ 0.3    |
| Spring | <i>n</i>                            | 270             | 25               | 211              |
|        | Temperature (°C)                    | 13.8 $\pm$ 1.1  | 12.8 $\pm$ 1.83  | 12 $\pm$ 1.2     |
|        | Salinity                            | 34.5 $\pm$ 0.2  | 31.9 $\pm$ 3.5   | 32.5 $\pm$ 0.2   |
|        | Oxygen (mg l <sup>-1</sup> )        | 4.2 $\pm$ 1.3   | 4.1 $\pm$ 2.2    | 6.9 $\pm$ 0.9    |
|        | Chlorophyll (mg C l <sup>-1</sup> ) | 8.18 $\pm$ 8.6  | 6.7 $\pm$ 7.5    | 3.3 $\pm$ 2.5    |
|        | <i>n</i>                            | 74              | 25               | 158              |
|        | $p\text{CO}_2$ ( $\mu\text{atm}$ )  | 696 $\pm$ 376   | 878 $\pm$ 698    | 461 $\pm$ 134    |
|        | $A_T$ ( $\mu\text{mol/kg}$ )        | 2 280 $\pm$ 29  | 2 156 $\pm$ 228  | 2 231.3 $\pm$ 11 |
|        | pH                                  | 7.88 $\pm$ 0.2  | 7.85 $\pm$ 0.3   | 8.0 $\pm$ 0.1    |
|        | $\Omega_{\text{arag}}$              | 1.8 $\pm$ 0.8   | 1.54 $\pm$ 0.8   | 1.9 $\pm$ 0.5    |
| Summer | <i>n</i>                            | 213             | 23               | 193              |
|        | Temperature (°C)                    | 15.8 $\pm$ 0.9  | 13.4 $\pm$ 1.8   | 14 $\pm$ 1       |
|        | Salinity                            | 34.3 $\pm$ 0.3  | 34.3 $\pm$ 0.3   | 32.8 $\pm$ 0.2   |
|        | Oxygen (mg l <sup>-1</sup> )        | 4.7 $\pm$ 0.8   | 2.3 $\pm$ 1.7    | 6.3 $\pm$ 1      |
|        | Chlorophyll (mg C l <sup>-1</sup> ) | 4.07 $\pm$ 2.9  | 6.7 $\pm$ 6.1    | 3 $\pm$ 2.8      |
|        | <i>n</i>                            | 9               | 20               | 103              |
|        | $p\text{CO}_2$ ( $\mu\text{atm}$ )  | 317 $\pm$ 41    | 1 134 $\pm$ 535  | 490 $\pm$ 167    |
|        | $A_T$ ( $\mu\text{mol/kg}$ )        | 2 298 $\pm$ 23  | 2 281.7 $\pm$ 33 | 2 235 $\pm$ 8    |
|        | pH                                  | 8.13 $\pm$ 0.05 | 7.68 $\pm$ 0.2   | 7.98 $\pm$ 0.13  |
|        | $\Omega_{\text{arag}}$              | 2.9 $\pm$ 0.3   | 1.22 $\pm$ 0.7   | 1.92 $\pm$ 0.5   |
| Autumn | <i>n</i>                            | 183             | 14               | 196              |
|        | Temperature (°C)                    | 14.5 $\pm$ 0.8  | 14.1 $\pm$ 1.2   | 12.2 $\pm$ 0.7   |
|        | Salinity                            | 34.3 $\pm$ 0.1  | 33.3 $\pm$ 0.7   | 33 $\pm$ 0.2     |
|        | Oxygen (mg l <sup>-1</sup> )        | 4.63 $\pm$ 0.7  | 5.6 $\pm$ 1.8    | 4.8 $\pm$ 0.6    |
|        | Chlorophyll (mg C l <sup>-1</sup> ) | 2.95 $\pm$ 3    | 8.4 $\pm$ 5.5    | 1.5 $\pm$ 1.5    |
|        | <i>n</i>                            | 9               | 14               | 104              |
|        | $p\text{CO}_2$ ( $\mu\text{atm}$ )  | 572 $\pm$ 129   | 422 $\pm$ 250    | 889 $\pm$ 114.5  |
|        | $A_T$ ( $\mu\text{mol/kg}$ )        | 2 302 $\pm$ 10  | 2 200 $\pm$ 34   | 2 254 $\pm$ 5    |
|        | pH                                  | 7.92 $\pm$ 0.07 | 8.05 $\pm$ 0.2   | 7.70 $\pm$ 0.08  |
|        | $\Omega_{\text{arag}}$              | 1.87 $\pm$ 0.24 | 2.36 $\pm$ 0.79  | 1.1 $\pm$ 0.2    |

throughout the year, fluctuating between 1.8 and 2.5 mg l<sup>-1</sup> (Figure 4b).

### Aragonite saturation state in shellfish farming areas

The physicochemical properties of the main oceanographic (e.g. upwelling, river discharge) and biological (photosynthesis: respiration) processes, or the combination of both, produced different patterns of temporal and spatial variability in the aragonite saturation state ( $\Omega_{\text{arag}}$ ) across shellfish farming areas. The lowest  $\Omega_{\text{arag}}$  was observed in the Arauco Gulf ( $\Omega_{\text{arag}} = 0.595$ ), especially during the warmer seasons (spring and summer) (Figure 4f), whereas Tongoy Bay was affected by low  $\Omega_{\text{arag}}$  conditions during spring. In contrast, Chiloé was affected by undersaturated conditions only during the colder seasons (winter and autumn). Therefore, significant differences in carbonate saturation states were observed between Chiloé and the lower latitude areas only during winter and autumn, while Tongoy Bay showed oversaturated

waters compared to higher latitude sites during summer (Tukey *post hoc* test,  $p < 0.001$ , Table 2).

### Carbonate system drivers

To evaluate the interplay between dominant biological processes that control carbon chemistry in the coastal ocean (e.g. respiration, photosynthesis) and other drivers such as river runoff and/or changing temperature, all  $\text{pH}_T$  data obtained through continuous measurements (buoys) and seasonal spatial sampling from the three coastal zones were correlated with temperature, chlorophyll concentration and DO. A significant positive relationship was found between DO and  $\text{pH}_T$  across all coastal zones ( $R^2 > 0.6$ ;  $p < 0.001$ , Figure 5). A positive relationship was also observed for temperature and  $\text{pH}_T$ ; however, it explained  $< 50\%$  of  $\text{pH}_T$  variability in the three nearshore sites (Figure 5). Chlorophyll *a* concentrations were not related to  $\text{pH}_T$  levels, but a seasonal coupling with  $\text{pH}_T$  was evident in Chiloé, where low total chlorophyll



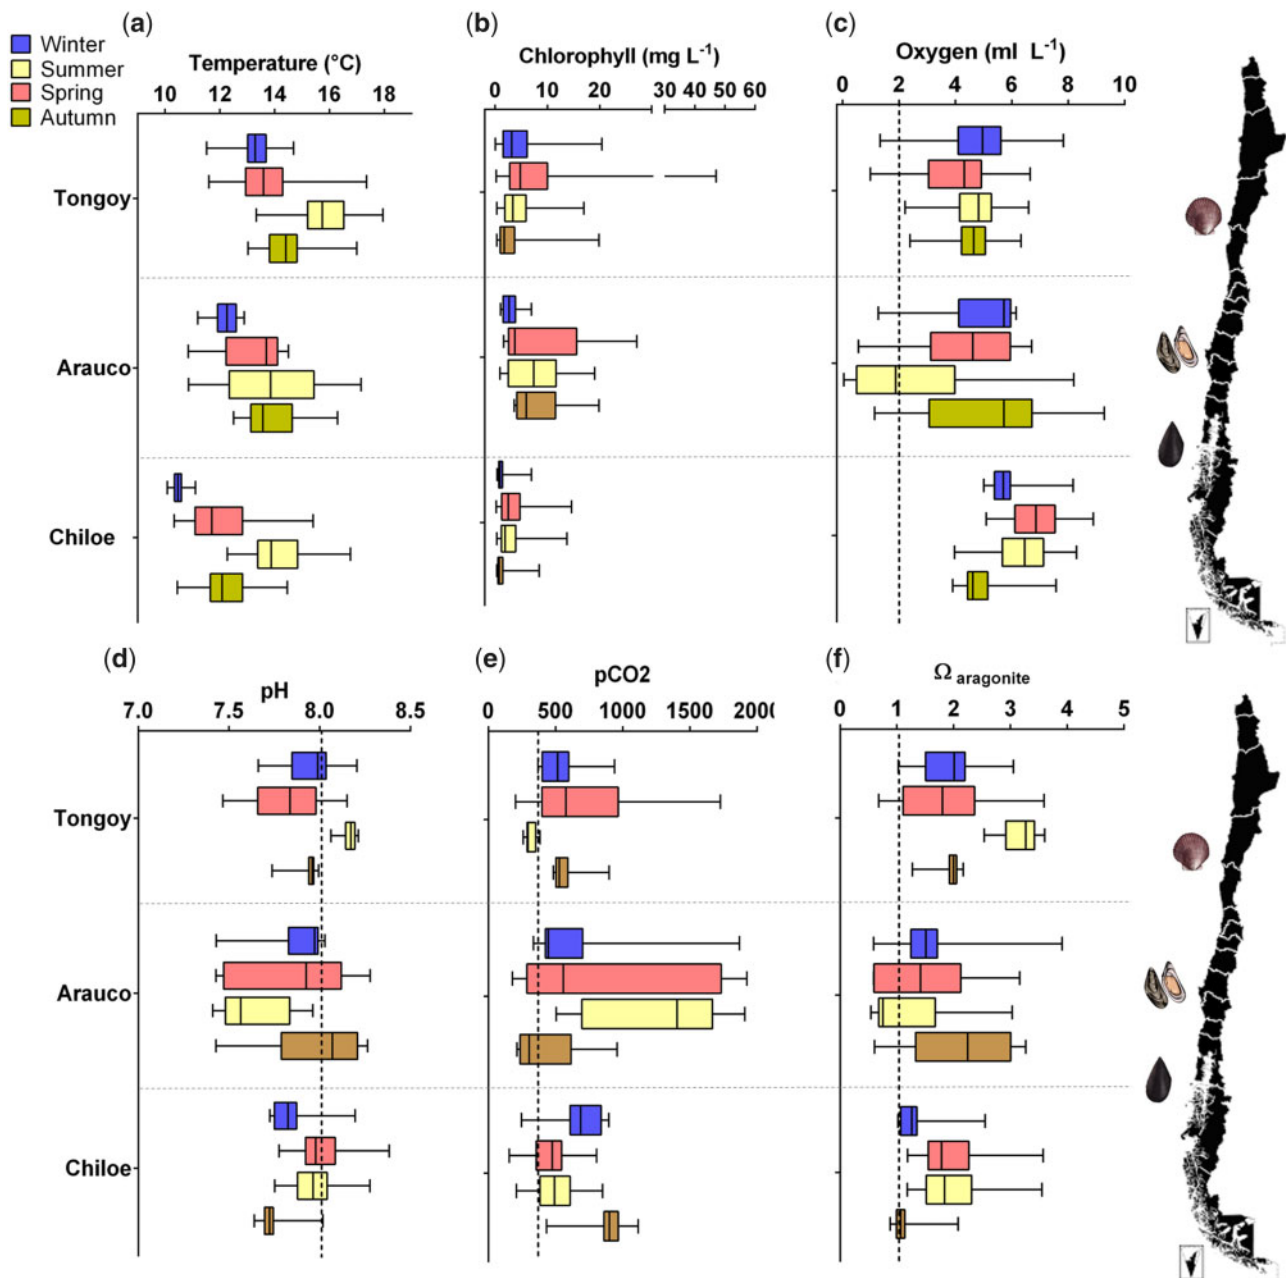

**Figure 4.** Seasonal mean and range of (a) subsurface temperature, (b) total chlorophyll, (c) DO, (d)  $\text{pH}_{\text{total}}$ , (e)  $\text{pCO}_2$ , and (f) Omega aragonite in three nearshore zones along the Chilean coast. Oceanographic parameters of Tongoy Bay come from a moored CTD, while carbonate system parameters in Arauco Gulf come from manual bi-monthly sampling; while these data were obtained from a buoy located in one station of Chiloé. Ranges of the carbonate system parameters for Tongoy Bay represent differences between sampling stations in summer, winter, and autumn and spring of an instrumental time series obtained at the moored location.

concentrations were observed mainly during the winter months (Figure 2c).

## Discussion

Bivalve aquaculture is concentrated in coastal areas exposed to multiple drivers that lead to highly variable environmental conditions, especially in seawater chemistry. The extreme range of variation documented among shellfish aquaculture areas in the present study is most likely related to the large latitudinal

gradient, ranging from persistent to strong seasonal upwelling along an exposed eastern boundary coastline, to a cyclical seasonal pattern within a semi-enclosed cold-temperate basin (Sobarzo *et al.*, 2007; Calvete and Sobarzo, 2011; Bravo *et al.*, 2016; Narváez *et al.*, 2019; Pérez-Santos *et al.*, 2019). The marked seasonality observed in Chiloé is explained mainly by the annual variation in solar heat flux and light availability across the area (Iriarte *et al.*, 2007; Garreaud *et al.*, 2013; Narváez *et al.*, 2019). Our temperature measurements at the lower latitude site

**Table 3.** Evaluation of significant differences for oceanographic and carbonate system parameters among seasons and study regions.

| Response         | Source      | df (source, error) | MS (mean square) | F     | p-Value | Tukey post hoc                                                       |
|------------------|-------------|--------------------|------------------|-------|---------|----------------------------------------------------------------------|
| pH               | Region      | 2                  | 0.259            | 10.31 | <0.0001 | Winter: Tongoy = Arauco > Chiloé                                     |
|                  | Season      | 3                  | 0.2035           | 8.1   | <0.0001 | Spring: Chiloé > Tongoy = Arauco                                     |
|                  | Interaction | 6                  | 0.8264           | 32.89 | <0.0001 | Summer: Tongoy > Arauco = Chiloé<br>Autumn: Tongoy = Arauco > Chiloé |
| Temperature      | Region      | 2                  | 915              | 1050  | <0.0001 | Winter: Tongoy > Arauco > Chiloé                                     |
|                  | Season      | 3                  | 227.7            | 261.2 | <0.0001 | Spring: Tongoy = Arauco > Chiloé                                     |
|                  | Interaction | 6                  | 22.42            | 25.71 | <0.0001 | Summer: Tongoy > Arauco = Chiloé<br>Autumn: Tongoy = Arauco > Chiloé |
| Oxygen           | Region      | 2                  | 449.8            | 423.4 | <0.0001 | Winter: Chiloé > Tongoy = Arauco                                     |
|                  | Season      | 3                  | 4.163            | 70.38 | 0.0084  | Spring: Chiloé > Tongoy = Arauco                                     |
|                  | Interaction | 6                  | 74.75            | 3.92  | <0.0001 | Summer: Chiloé > Tongoy = Arauco<br>Autumn: Chiloé > Tongoy > Arauco |
| pCO <sub>2</sub> | Region      | 2                  | 743 943          | 11.46 | <0.0001 | Winter: Tongoy = Arauco < Chiloé                                     |
|                  | Season      | 3                  | 309 929          | 4.776 | 0.0027  | Spring: Arauco > Tongoy > Chiloé                                     |
|                  | Interaction | 6                  | 1.98E+06         | 30.54 | <0.0001 | Summer: Arauco > Chiloé > Tongoy<br>Autumn: Chiloé > Tongoy = Arauco |
| Chlorophyll      | Region      | 2                  | 1 784            | 95.26 | <0.0001 | Winter: Tongoy > Chiloé                                              |
|                  | Season      | 3                  | 355.5            | 18.99 | <0.0001 | Spring: Arauco > Tongoy > Chiloé                                     |
|                  | Interaction | 6                  | 223.1            | 11.92 | <0.0001 | Summer: Arauco > Chiloé = Tongoy<br>Autumn: Arauco > Tongoy > Chiloé |
| Omega Aragonite  | Region      | 2                  | 12.1             | 48.18 | <0.0001 | Winter: Arauco = Tongoy > Chiloé                                     |
|                  | Season      | 3                  | 1.49             | 5.94  | <0.0005 | Spring: Tongoy = Chiloé = Arauco                                     |
|                  | Interaction | 6                  | 2.839            | 11.31 | <0.0001 | Summer: Tongoy > Arauco = Chiloé<br>Autumn: Arauco = Tongoy > Chiloé |

(Tongoy Bay) showed more energetic variability than at the southern site (Chiloé) across all temporal scales, in agreement with the year-round upwelling-favourable conditions found in this study (see also Rutlant and Montecino, 2002; Aguirre et al., 2012). This also complements the upwelling dynamics reported for this area (Bravo et al., 2016). However, temperature is not the main driver of the carbonate system variability, which was reflected by its weak linear relation with pH<sub>T</sub>.

Unlike offshore oceanic waters, where pH<sub>T</sub> ranges between 8 and 8.3, the pH<sub>T</sub> of the nearshore areas where bivalve aquaculture takes place is normally lower than that observed in the open ocean, reaching values <7.8 during spring and summer in the lower latitude areas due to the incidence of more acidic upwelling waters (Vargas et al., 2017). Minimum pH<sub>T</sub> values as low as 7.40 observed in the Arauco Gulf during upwelling-favourable conditions (summer 2017) are among the lowest levels reported to date for the surface ocean (Hofmann et al., 2011; Melzner et al., 2013; Chan et al., 2017). Despite the well-known occurrence of upwelling events in Tongoy Bay (reviewed by Aguilera et al., 2018), our short time series were not able to detect high pCO<sub>2</sub> levels in this area. However, values of pH<sub>T</sub> <7.4 were also recorded during some spring days, which are not uncommon for the area (Figure 2a, see Lagos et al., 2016). In Chiloé (43°S), lower pH<sub>T</sub> (~7.6) and higher pCO<sub>2</sub> values were only detected during the cold seasons, coinciding with freshwater input. No relationship was found between salinity and pH<sub>T</sub>, supporting that, in coastal regions, the pH is controlled by the balance between photosynthesis and respiration (Vargas et al., 2017; Narváez et al., 2019).

The wide range of variability in the carbonate system parameters in the Arauco Gulf appears to be linked to two dominant environmental drivers—coastal upwelling during summer and spring and river discharges during winter and autumn (Vargas et al., 2016). This zone is considered as one of the most productive river-influenced upwelling areas in the South Pacific coast

(Daneri et al., 2000), with very low  $\Omega_{\text{arag}}$  levels (~1) during upwelling conditions in spring and summer, while the freshwater discharge during the cold season affects the alkalinity/salinity, and therefore  $\Omega_{\text{arag}}$  levels. The low  $\Omega_{\text{arag}}$ , low pH, and high pCO<sub>2</sub> conditions observed during upwelling periods are combined with the presence of nearly anoxic waters (<0.5 ml O<sub>2</sub> l<sup>-1</sup>), as suggested by Melzner et al. (2013) for highly productive coastal zones. However, chlorophyll concentration reached its highest levels during spring months, meaning that more phytoplankton is available at this site during warmer seasons. We also observed inter-annual differences in pH<sub>T</sub> and oxygen (mainly during spring and summer months), which might be related to the influence of the strong El Niño event that affected the Chilean coast during the summer of 2016 (Santoso et al., 2017). In higher latitudes (Chiloé),  $\Omega_{\text{arag}}$  is low (<1.5) only during colder seasons due to the influence of freshwater discharges, but oxygen levels were always near normoxic levels (>4 ml l<sup>-1</sup>, Figure 4c) and, therefore, this should not be a relevant stressor for the farmed mussels.

The analysis of the frequency components between our low and high latitude sites highlights that an important fraction of the environmental variability was spread over a wide range of frequencies. High energy was mostly associated with the dominant semi-diurnal and diurnal tidal regimes. However, longer periods related to synoptic variability can be associated with the frequent favourable upwelling conditions produced throughout the year, but especially during summer and spring at the Tongoy Bay site (Bravo et al., 2016) and the passage of weather systems in the Chiloé area (Pérez-Santos et al., 2019). Patterns of temporal variability also differed between parameters; temperature and oxygen covaried, and while total chlorophyll showed higher variability in both localities, pH showed less variability compared to the other parameters in the Chiloé site. Given the short time scale of this time series, it is difficult to find an explanation for these between-

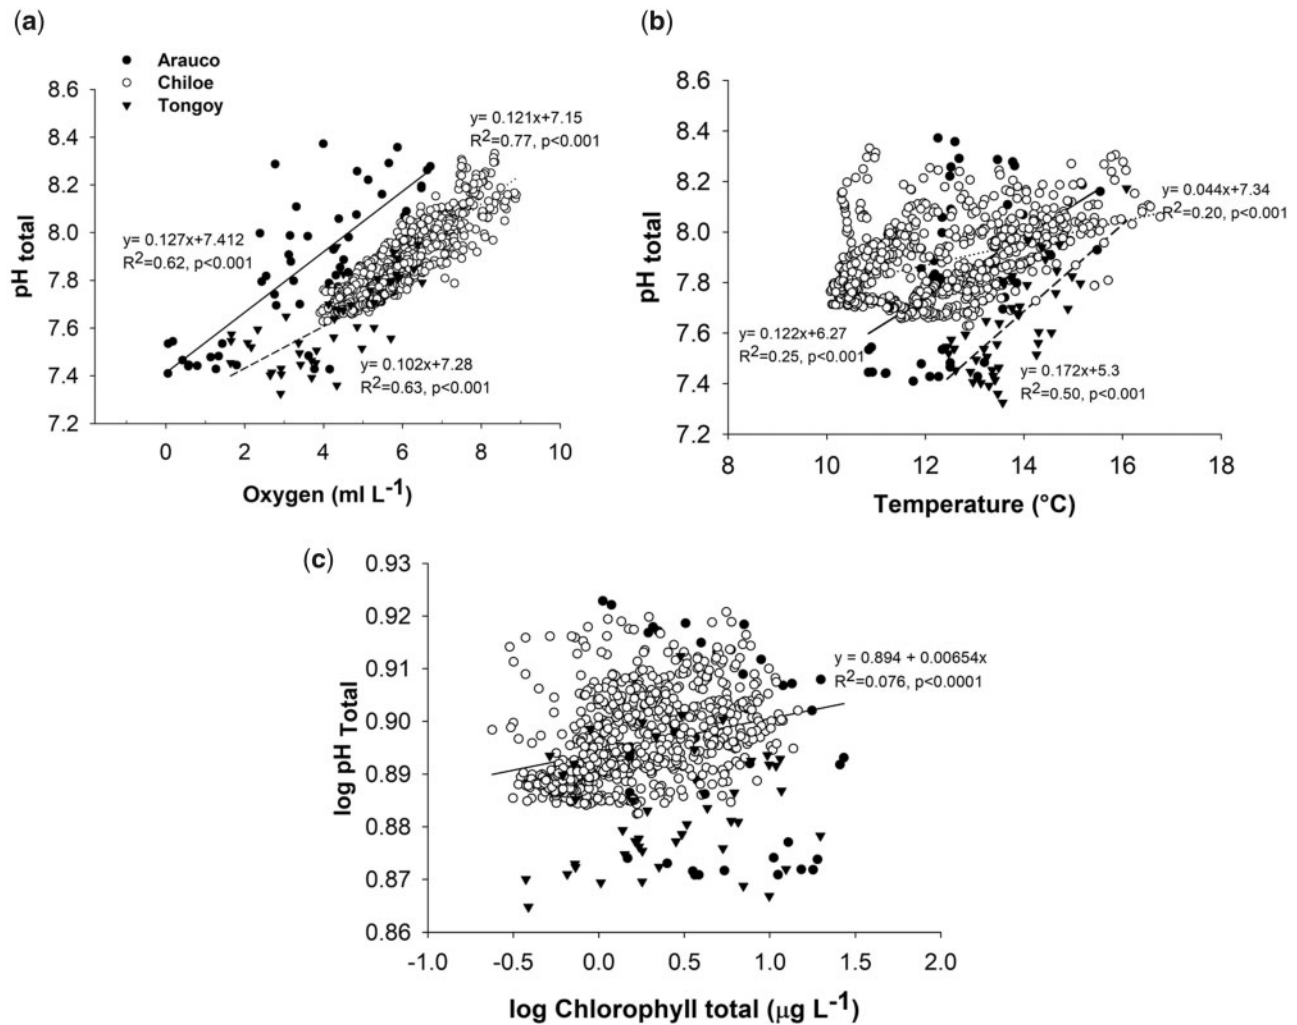

**Figure 5.** Relation between oceanographic parameters and pH<sub>T</sub> in three nearshore zones along the Chilean coast, (a) DO and pH<sub>T</sub>; (b) subsurface temperature and pH<sub>T</sub>; and (c) total chlorophyll and pH<sub>T</sub> in a logarithmic scale to normalize their distributions.

site differences. Due to their impact on shellfish aquaculture, they should be the focus of future research in these areas.

### Biological implications for shellfish farming species

During the last 15 years, different studies have been conducted for different coastal regions worldwide of biological responses of shellfish farming species to changing temperature, oxygen, total chlorophyll, and/or pH/pCO<sub>2</sub>. The study of reaction norms, the phenotypic expression of a single genotype across a range of environmental conditions (Platt and Sanislow, 1988), has been a useful experimental tool to address questions related to the effect of environmental drivers on different populations of marine organisms (Vargas *et al.*, 2017). Useful patterns have emerged from biological response experiments. For instance, some studies demonstrated the relevance of temperature on the growth and physiology of adult *M. chilensis* (Guenuman, 2014; Navarro *et al.*, 2016) and on their larval development and growth (Lagos *et al.*, 2012). For *A. purpuratus*, temperature is relevant for metabolic rate (González *et al.*, 2002), gonad maturation, and larval survival (Martínez *et al.*, 2000a, b). Lagos *et al.* (2016) found an interactive effect between temperature and pH on juvenile scallop

growth rate, demonstrating that, under upwelling conditions (low temperature and low pH/high pCO<sub>2</sub>), this species decreased its growth, favouring reproduction (Cantillanez *et al.*, 2005). The seedstock used by the aquaculture industry for all the studied species comes mainly from wild larvae settled on artificial larval collectors (Lara *et al.*, 2016; Von Brand *et al.*, 2016). Seeds are then transferred to locations that can be hundreds of km away from the source populations, which disrupts connectivity patterns and hinders the replenishment of benthic populations. Although *M. chilensis* populations seem to be mixing over scales of tens to hundreds of km, there is evidence of local adaptation processes (Araneda *et al.*, 2016; Astorga *et al.*, 2020). Population genetic studies have shown that transplanting seedstock between locations can interact with dispersal processes, driving an artificial genetic population structure (Moehler *et al.*, 2011), and interfering with processes of local adaptation that are important for population persistence in variable environments (Silliman, 2019). As the larval development times of *A. purpuratus* and both *Mytilus* species are similar (16–25 days, Ruiz *et al.*, 2008; Von Brand *et al.*, 2016), it is likely that similar processes may operate for scallops. Despite the relevance of these studies for understanding the

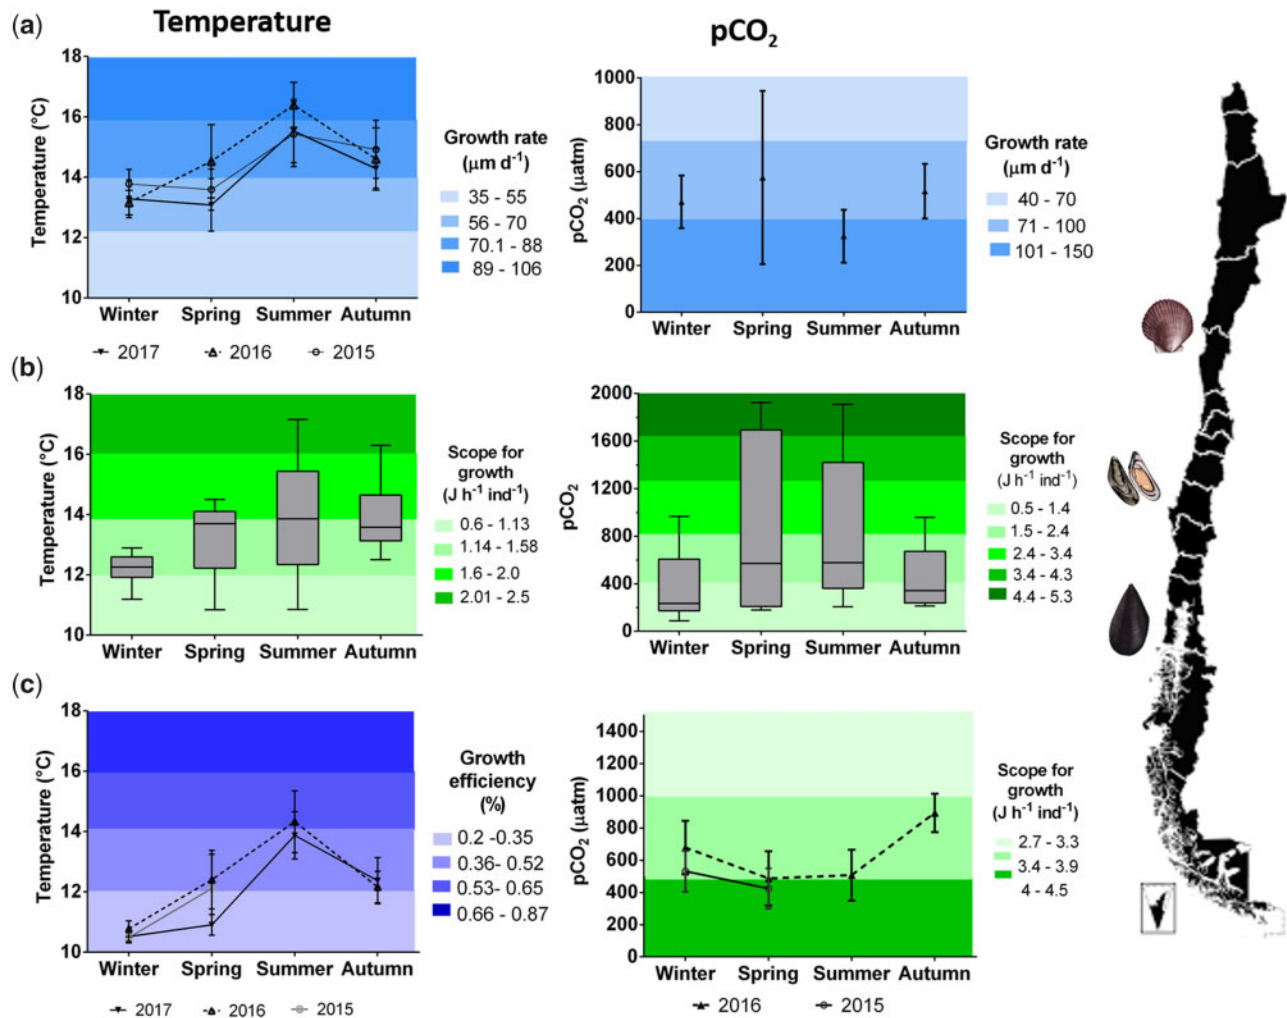

**Figure 6.** Relation between seawater temperature and  $p\text{CO}_2$  levels for growth rate, growth efficiency, and scope for growth of aquaculture-relevant bivalves along a latitudinal gradient. (a) *Argopecten purpuratus* in the northern zone, (b) *Mytilus galloprovincialis* in the central zone, and (c) *M. chilensis* in the southern zone. Growth responses to  $p\text{CO}_2$  and temperature were obtained from different laboratory and *in situ* experiments with this species (Fernández-Reiriz et al., 2012, Fly and Hilbish, 2013, Guenuman, 2014, Lagos et al., 2016, Navarro et al., 2016).

influence of environmental variability on the biology of the organisms, it is still difficult to interpret this information in the context of natural environmental variability.

We represented the relevance of the environmental and chemical variability in the biology of relevant aquaculture bivalves through a schematic representation of mean seasonal temperature and  $p\text{CO}_2$  variability observed in the studied aquaculture areas, and a gradient of growth responses associated with these parameters (Figure 6). These growth responses are based on a literature review of different experimental studies conducted with the same scallop and mussel species (Fernández-Reiriz et al., 2012; Fly and Hilbish, 2013; Navarro et al., 2013, Guenuman, 2014; Lagos et al., 2016; Navarro et al., 2016). Here, we aimed to discuss the relation between natural environmental variability and potential biological responses (Supplementary material). Based on this approach, we suggest that scallop growth could be enhanced due to higher temperatures ( $>16^\circ\text{C}$ ) and lower  $p\text{CO}_2$  levels ( $<400$ ) during summer (Figure 6a). It is clear that this species can grow properly year-round, with lower growth only during spring, following the periodic upwelling events that bring more acidic, hypoxic, and

cold waters near the coast (Figure 6a). Interestingly, this interpretation was recently confirmed by Ramajo et al. (2019), where the lowest growth rates were found in cold-hypoxic-acidic waters.

In the Arauco Gulf area, where *M. galloprovincialis* is the main aquaculture species, our analysis suggests that environmental conditions could be favourable for growth especially during spring and summer, following higher temperatures and high  $p\text{CO}_2$  levels ( $>1400 \mu\text{atm}$ ) (Figure 6b). The scope for growth in this species is enhanced by higher  $p\text{CO}_2$  levels (Fernández-Reiriz et al., 2012), explaining the potential for aquaculture in this geographic location during upwelling-favourable conditions (spring and summer). The shellfish farming area is subject to hypoxic waters ( $<2 \text{ ml l}^{-1}$ ) during and after upwelling events, reaching values  $<0.5 \text{ ml l}^{-1}$  during some days in spring and summer, especially in deeper waters. This means that organisms exposed to a combination of hypoxic and acidic waters have high food concentrations (Chl *a*), which, in turn, may allow mussels to counteract the effects of these stressful conditions (Ramajo et al., 2016). In Chiloé, *M. chilensis* growth also appeared to be

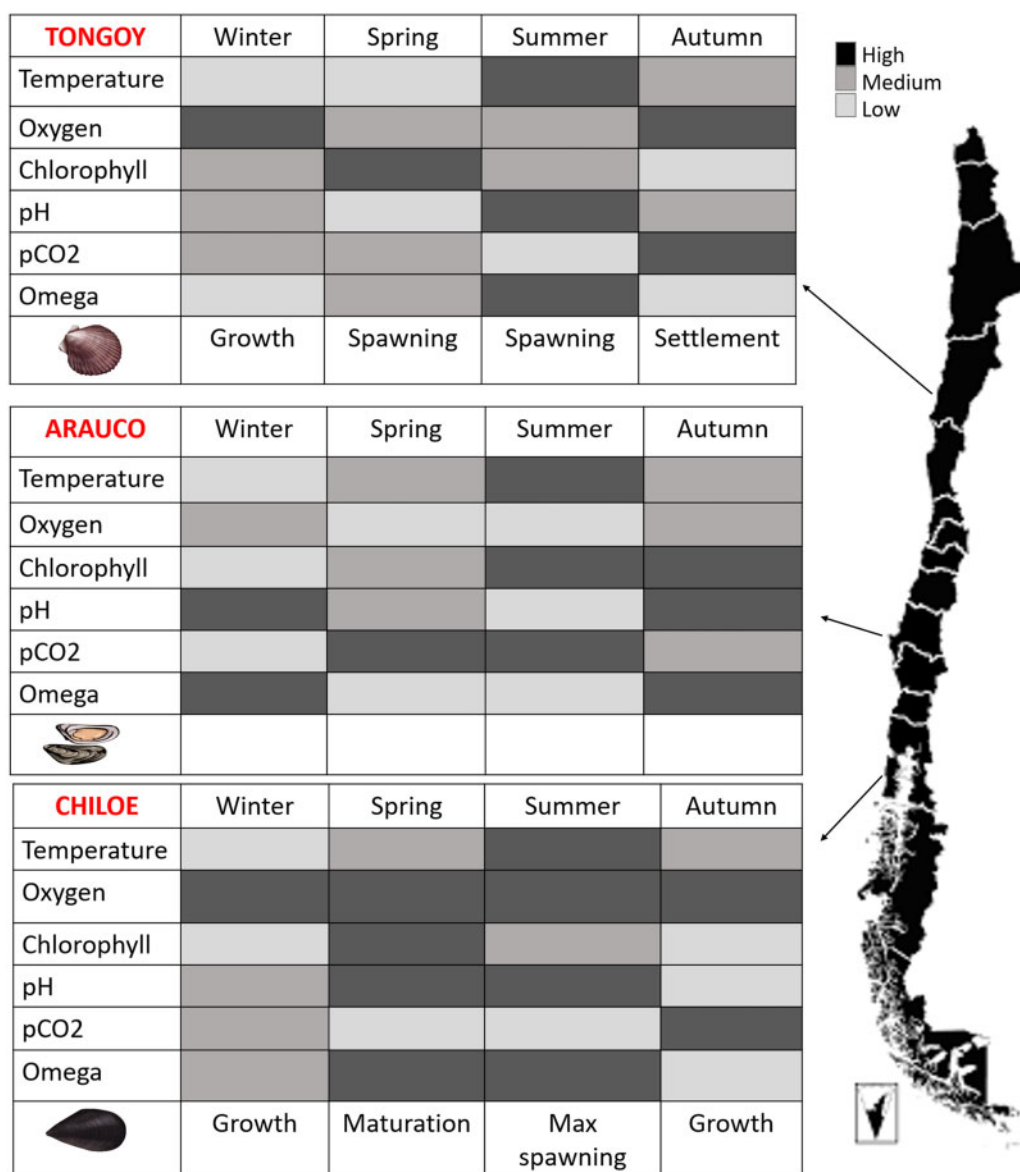

**Figure 7.** Conceptual model of favourable environmental conditions and life-cycle events of the main cultured species in three nearshore zones of Chile. High, medium, and low levels were chosen in relation to the local range of environmental variability. More specific data are shown in Table 2.

enhanced during summer due to elevated temperatures ( $>14^{\circ}\text{C}$ ) and lower  $p\text{CO}_2$  levels ( $<500 \mu\text{atm}$ ) (Figure 6c).

A key parameter for shellfish aquaculture is the aragonite saturation state, especially for protoconch formation in bivalve larvae (Waldbusser *et al.*, 2015a, b). This is a highly predictive parameter linking carbonate chemistry changes to biological impacts on molluscs and therefore for shellfish aquaculture (Barton *et al.*, 2015). Waldbusser *et al.* (2015b) proposed a threshold of tolerance for bivalve shell formation in larvae of  $<1.5 \Omega_{\text{arag}}$  in the sea-water used for oyster larval hatcheries to break even. The saturation state of Tongoy Bay was above 1 throughout the year, with only a few days of undersaturation (Figure 4). In this zone, *A. purpuratus* lives throughout the year in oversaturated waters, especially during spring and summer, suggesting favourable conditions for shell formation and larval development (Barton *et al.*,

2012, 2015). However, these carbonate system data were obtained from few samples due to the lack of a longer  $\text{pH}_T$  and  $A_T$  time series, which would allow a detailed description of  $\Omega_{\text{arag}}$  variability in this coastal zone. The available pH data from Tongoy Bay indicated potential undersaturation of calcium carbonate during spring, which agrees with the intense  $\text{CO}_2$  outgassing of this upwelling system (Torres and Ampuero, 2009). Considering the lower temperature, higher  $p\text{CO}_2$ , lower pH, and  $\Omega_{\text{arag}} < 1$ , decreased scallop growth should be observed during spring, which would then increase during summer due to higher temperatures, overcoming the negative impact of acidic upwelling waters (Lagos *et al.*, 2016).

Undersaturated waters were present in the Arauco Gulf area during all seasons, particularly during austral spring and summer. Therefore, the optimal season for *M. galloprovincialis*

development and growth is winter and autumn, following the lower incidence of days with low  $\Omega_{\text{arag}}$  conditions (Barton *et al.*, 2012, 2015; Waldbusser *et al.*, 2015b). In Chiloé, mussels were exposed during colder seasons (winter and autumn) to almost undersaturated waters ( $\Omega_{\text{arag}} \sim 1$ ), and thus, the optimal seasons for development and shell growth may be during spring and summer, which agrees well with higher concentrations of *M. chilensis* larvae found during both seasons in the Inner Sea of Chiloé (Guzmán *et al.*, 2014; Lara *et al.*, 2016).

Interestingly, our results also indicate that studies that have attempted to evaluate the effects of ocean warming or acidification using future scenarios have tested parameter values that are within the range of local variability for populations of some species (Vargas *et al.*, 2017). For instance, Ramajo *et al.* (2016) and Lagos *et al.* (2016) considered present conditions and OA projection as pH levels of 8.0 and 7.6, respectively, which are within the range of natural variability for Tongoy Bay in northern Chile. This is a highly relevant issue, since although those results are highly useful for understanding the biological response of scallops on changing  $p\text{CO}_2$  or temperature natural conditions, null or positive biological responses cannot assume that those species are tolerant or adapted to future OA or warming conditions; scientific input for climate change adaptation strategies with local and small-scale fishing communities is required.

Considering all parameters, we developed a conceptual model relating the life cycle of the main cultured species and the environmentally favourable conditions (Figure 7). The optimal conditions for scallops occur during summer, matching the main spawning season, while for the Chilean mussel, in spring and summer favourable environmental conditions coincide with maturation and spawning events. For *M. galloprovincialis*, the lack of local life-cycle studies complicates making clear associations with environmental conditions, yet autumn appears as the favourable season for growth and development.

Our conceptual model clearly demonstrates the need for more and better time series of environmental conditions in the coastal zone, especially in aquaculture areas. This information will allow for an improved connection between environmental conditions and the biological responses of farmed species. This type of information is crucial to understand the scale and magnitude of fluctuations in aquaculture potential under future climate (Boehm *et al.*, 2015; Yáñez *et al.*, 2017; Froehlich *et al.*, 2018), thus informing decision-makers and stakeholders about pathways to sustainable aquaculture (Broitman *et al.*, 2017). A surprising issue detected by our study is the lack of detailed studies examining life-cycle variability for the different bivalves cultured under the environmental fluctuations they encounter in their native habitats, together with whole-organism responses to these fluctuations (Calosi *et al.*, 2013; Ramajo *et al.*, 2016; Thomsen *et al.*, 2017). Following the potential introduction of new species or the use of seedstock sourced from other latitudes (Astorga *et al.*, 2020), cultured populations will be exposed to new environmental conditions that may affect proper development and growth. We highlight that a better understanding of the plastic response of cultured species to environmental variability and a detailed characterization of the reaction norms of relevant traits are key for sustainable shellfish aquaculture in the face of climate change.

### Data availability statement

Oceanographic and carbonate chemistry data was generated in the course of the study, while wind results was generated through

analysis of third-party data. Most part of the data is available on Global Ocean Acidification Observing Network (GOA-ON portal (Tongoy Balsa CMET: [http://portal.goa-on.org/Explorer?action=oiw:mobile\\_platform:ARGO\\_702](http://portal.goa-on.org/Explorer?action=oiw:mobile_platform:ARGO_702)) and (Chiloé: [http://portal.goa-on.org/Explorer?action=oiw:mobile\\_platform:ARGO\\_702](http://portal.goa-on.org/Explorer?action=oiw:mobile_platform:ARGO_702))). Any other data will be shared on reasonable request to the corresponding author.

### Supplementary data

Supplementary material is available at the ICESJMS online version of the manuscript.

### Acknowledgements

We gratefully acknowledge helpful discussions with Dr Antonio Cuevas (MUSELS-UdeC) and the committed collaboration of Maria Valladares, Manuel Nuñez, and Paul Watt (CEAZA-Coquimbo). We also appreciate the contribution of Punta Lavapié wind data provided by Dr. Oscar Pizarro.

### Funding

This research was supported by Millennium Nucleus Center for the Study of Multiple-drivers on Marine Socio-Ecological Systems (MUSELS) funded by MINECON NC120086 and the Post-Doctoral FONDECYT Project 3150392 to LMS. Additional support was provided by FONDECYT (1170065, 1190805, and 1181300) to CAV, GSS, and BRB, respectively, and from the Millennium Institute of Oceanography (IMO) funded by MINECON NC 120019.

### References

- Aguilera, M. A., Aburto, J., Bravo, L., Broitman, B. R., Garcia, R. A., Gaymer, C. F., Gelcich, S., et al. 2018. Chile: environmental status and future perspectives. In *World Seas: An Environmental Evaluation, Vol I: Europe, The Americas and West Africa*, 2nd edn, pp. 673–702. Ed. by Ch. Sheppard. Academic Press, New York, USA. 892 p.
- Aguirre, C., Pizarro, O., Strub, P. T., Garreaud, R., and Barth, J. A. 2012. Seasonal dynamics of the near-surface alongshore flow off central Chile. *Journal of Geophysical Research: Oceans*, 117: 1–17.
- Alarcón, E., Valdés, N., and Torres, R. 2015. Calcium carbonate saturation state in an area of mussels culture in the Reloncaví Sound, Northern Patagonia, Chile. *Latin American Journal of Aquatic Research*, 43: 277–281.
- Araneda, C., Larraín, M. A., Hecht, B., and Narum, S. 2016. Adaptive genetic variation distinguishes Chilean blue mussels (*Mytilus chilensis*) from different marine environments. *Ecology and Evolution*, 6: 3632–3644.
- Astorga, M. P., Cárdenas, L., Pérez, M., Toro, J. E., Martínez, V., Farías, A., and Uriarte, I. 2020. Complex spatial genetic connectivity of mussels *Mytilus chilensis* along the Southeastern Pacific coast and its importance for resource management. *Journal of Shellfish Research*, 39: 77–86.
- Barton, A., Hales, B., Waldbusser, G. G., Langdon, C., and Feely, R. A. 2012. The Pacific oyster, *Crassostrea gigas*, shows negative correlation to naturally elevated carbon dioxide levels: implications for near-term ocean acidification effects. *Limnology and Oceanography*, 57: 698–710.
- Barton, A., Waldbusser, G. G., Feely, R. A., Weisberg, S. B., Newton, J. A., Hales, B., Cudd, S., et al.; Whiskey Creek Shellfish Hatchery. 2015. Impacts of coastal acidification on the Pacific Northwest shellfish industry and adaptation strategies implemented in response. *Oceanography*, 25: 146–159.
- Boehm, A. B., Jacobson, M. Z., O'Donnell, M. J., Sutula, M., Wakefield, W. W., Weisberg, S. B., and Whiteman, E.; Stanford

- University. 2015. Ocean acidification science needs for natural resource managers of the North American West Coast. *Oceanography*, 25: 170–181.
- Bravo, L., Ramos, M., Astudillo, O., Dewitte, B., and Goubanova, K. 2016. Seasonal variability of the Ekman transport and pumping in the upwelling system off central-northern Chile ( $\sim 30^\circ\text{S}$ ) based on a high-resolution atmospheric regional model (WRF). *Ocean Science*, 12: 1049–1065.
- Broitman, B., Halpern, B., Gelcich, S., Lardies, M., Vargas, C., Vásquez, F., Widdicombe, S., *et al.* 2017. Dynamic interactions among boundaries and the expansion of sustainable aquaculture. *Frontiers in Marine Science*, 4: 15.
- Calosi, P., Rastrick, S.P.S., Lombardi, C., de Guzman, H. J., Davidson, L., Jahnke, M., Giangrande, A., *et al.* 2013. Adaptation and acclimatization to ocean acidification in marine ectotherms: an in situ transplant experiment with polychaetes at a shallow CO<sub>2</sub> vent system. *Philosophical Transactions of the Royal Society B: Biological Sciences*, 368:20120444.
- Calvete, C., and Sobarzo, M. 2011. Quantification of the surface brackish water layer and frontal zones in southern Chilean fjords between Boca del Guafo and Estero Elefantos. *Continental Shelf Research*, 31: 162–171.
- Cantillanez, M., Avendaño, M., Thouzeau, G., and Le Penneç, M. 2005. Reproductive cycle of *Argopecten purpuratus* (Bivalvia: Pectinidae) in La Rinconada marine reserve (Antofagasta, Chile): response to environmental effects of El Niño and La Niña. *Aquaculture*, 246: 181–195.
- Clements, J. C., and Chopin, T. 2017. Ocean acidification and marine aquaculture in North America: potential impacts and mitigation strategies. *Reviews in Aquaculture*, 9: 326–341.
- Chan, F., Barth, J. A., Byrne, R. H., Cheriton, O., Friederich, G., Gaylord, B., Gouhier, T., *et al.* 2017. Persistent spatial structuring of coastal ocean acidification in the California Current System. *Scientific Reports*, 7: 1–7.
- Daneri, G., Dellarossa, V., Quiñones, R., Jacob, B., Montero, P., and Ulloa, O. 2000. Primary production and community respiration in the Humboldt Current System off Chile and associated oceanic areas. *Marine Ecology Progress Series*, 197: 41–49.
- Díaz, R. J., and Rosenberg, R. 1995. Marine benthic hypoxia: a review of its ecological effects and the behavioural responses of benthic macrofauna. *Oceanography and Marine Biology Annual Review*, 33: 245–303.
- Dickson, A. G. 1990. Standard potential of the reaction:  $\text{AgCl}(s) + \frac{1}{2}\text{H}_2(g) = \text{Ag}(s) + \text{HCl}(aq)$ , and the standard acidity constant of the ion  $\text{HSO}_4$  in synthetic sea water from 273.15 to 318.15 K. *The Journal of Chemical Thermodynamics*, 22: 113–127.
- Dickson, A. G., and Millero, F. J. 1987. A comparison of the equilibrium constants for the dissociation of carbonic acid in seawater media. *Deep Sea Research Part A. Oceanographic Research Papers*, 34: 1733–1743.
- Dickson, A. G., Sabine, C. L., and Christian, J. R. 2007. Guide to best practices for ocean CO<sub>2</sub> measurements. PICES Special Publication, 3: 191.
- Duarte, C., Navarro, J. M., Acuña, K., Torres, R., Manríquez, P. H., Lardies, M. A., Vargas, C. A., *et al.* 2015. Intraspecific variability in the response of the edible mussel *Mytilus chilensis* (Hupe) to ocean acidification. *Estuaries and Coasts*, 38: 590–598.
- Emery, W. J., and Thomson, R. E. 2004. *Data Analysis Methods in Physical Oceanography*, 2nd edn. Elsevier, Amsterdam.
- FAO. 2018. The State of World Fisheries and Aquaculture: Meeting the Sustainable Development Goals. FAO, Rome.
- Fassbender, A. J., Alin, S. R., Feely, R. A., Sutton, A. J., Newton, J. A., and Byrne, R. H. 2017. Estimating total alkalinity in the Washington State coastal zone: complexities and surprising utility for ocean acidification research. *Estuaries and Coasts*, 40: 404–418.
- Fernández, F. J., Ponce, R. D., Vásquez-Lavin, F., Figueroa, Y., Gelcich, S., and Dresdner, J. 2018. Exploring typologies of artisanal mussel seed producers in southern Chile. *Ocean and Coastal Management*, 158: 24–31.
- Fernández-Reiriz, M. J., Range, P., Álvarez-Salgado, X. A., Espinosa, J., and Labarta, U. 2012. Tolerance of juvenile *Mytilus galloprovincialis* to experimental seawater acidification. *Marine Ecology Progress Series*, 454: 65–74.
- Fitzer, S. C., McGill, R. A. R., Torres Gabarda, S., Hughes, B., Dove, M., O'Connor, W., and Byrne, M. 2018. Selectively bred oysters can alter their biomineralization pathways, promoting resilience to environmental acidification. *Global Change Biology*, 25: 4105–4115.
- Fly, E. K., and Hilbish, T. J. 2013. Physiological energetics and biogeographic range limits of three congeneric mussel species. *Oecologia*, 172: 35–46.
- Froehlich, H. E., Runge, C. A., Gentry, R. R., Gaines, S. D., and Halpern, B. S. 2018. Comparative terrestrial feed and land use of an aquaculture-dominant world. *Proceedings of the National Academy of Sciences of the United States of America*, 115: 5295–5300.
- Gallardo, M., González López, A., Ramos, M., Mujica, A., Muñoz, P., Sellanes, J., and Yannicelli, B. 2017. Reproductive patterns in demersal crustaceans from the upper boundary of the OMZ off north-central Chile. *Continental Shelf Research*, 141: 26–37.
- Garreaud, R. D., Lopez, P., Minvielle, M., and Rojas, M. 2013. Large-scale control on the Patagonian climate. *Journal of Climate*, 26: 215–230.
- Gazeau, F., Parker, L. M., Comeau, S., Gattuso, J. P., O'Connor, W. A., Martin, S., Pörtner, H. O., *et al.* 2013. Impacts of ocean acidification on marine shelled molluscs. *Marine Biology*, 160: 2207–2245.
- Gentry, R. R., Froehlich, H. E., Grimm, D., Kareiva, P., Parke, M., Rust, M., Gaines, S. D., *et al.* 2017. Mapping the global potential for marine aquaculture. *Nature Ecology & Evolution*, 1: 1317–1324.
- González, M. L., López, D. A., Pérez, M. C., and Castro, J. M. 2002. Effect of temperature on the scope for growth in juvenile scallops *Argopecten purpuratus* (Lamarck, 1819). *Aquaculture International*, 10: 339–349.
- Guenuman, M. C. 2014. Efectos Del Cambio en la Temperatura Del Agua de Mar Sobre el Balance Energético en Adultos de *Mytilus chilensis*, *Mytilus Galloprovincialis* y Sus Híbridos, Bajo Condiciones de Laboratorio. Tesis UACH. <http://cybertesis.uach.cl/tesis/uach/2014/fcg927e/doc/fcg927e.pdf> (last accessed 10 August 2020).
- Guzmán, L., Herrera, M., Mejías, P., Opazo, D., and Oyarzún, M. 2014. Informe Final Programa de monitoreo y vigilancia de disponibilidad larval de mitílidos para la sustentabilidad de la actividad acuicultura en el mar de Chiloé (Región de Los Lagos) y Estero Pitipalena (Región de Aysén). IFOP, Subsecretaría de Economía y EMT, Chile. 304 pp.
- Hofmann, G. E., Smith, J. E., Johnson, K. S., Send, U., Levin, L. A., Micheli, F., Paytan, A., *et al.* 2011. High-frequency dynamics of ocean pH: a multi-ecosystem comparison. *PLoS One*, 6: e28983.
- Iriarte, J. L., González, H. E., Liu, K. K., Rivas, C., and Valenzuela, C. 2007. Spatial and temporal variability of chlorophyll and primary productivity in surface waters of southern Chile (41.5–43° S). *Estuarine, Coastal and Shelf Science*, 74: 471–480.
- Jiang, Z. P., Tyrrell, T., Hydes, D. J., Dai, M., and Hartman, S. E. 2014. Variability of alkalinity and the alkalinity-salinity relationship in the tropical and subtropical surface ocean. *Global Biogeochemical Cycles*, 28: 729–742.
- Koroleff, F. 1972. *Methods of Seawater Analysis*, Verlag Chemie, Weinheim-New York.
- Lagos, L., Uriarte, I., and Yany, G. 2012. Evaluación del potencial reproductivo del chorito (*Mytilus chilensis*) de dos poblaciones

- naturales sometidas a diferentes temperaturas de acondicionamiento. *Latin American Journal of Aquatic Research*, 40: 389–397.
- Lagos, N. A., Benítez, S., Duarte, C., Lardies, M. A., Broitman, B. R., Tapia, C., Tapia, P., *et al.* 2016. Effects of temperature and ocean acidification on shell characteristics of *Argopecten purpuratus*: implications for scallop aquaculture in an upwelling-influenced area. *Aquaculture Environment Interactions*, 8: 357–370.
- Lara, C., Saldías, G. S., Tapia, F. J., Iriarte, J. L., and Broitman, B. R. 2016. Interannual variability in temporal patterns of Chlorophyll-*a* and their potential influence on the supply of mussel larvae to inner waters in northern Patagonia (41–44° S). *Journal of Marine Systems*, 155: 11–18.
- Lardies, M. A., Arias, M. B., Poupin, M. J., Manríquez, P. H., Torres, T., Vargas, C. A., Navarro, J. M., *et al.* 2014. Differential response to ocean acidification in physiological traits of *Concholepas concholepas* populations. *Journal of Sea Research*, 90: 127–134.
- Lovatelli, A., Farías, A., and Uriarte, I. 2008. Estado actual del cultivo y manejo de moluscos bivalvos y su proyección futura. Factores que afectan su sustentabilidad futura en América Latina. *FAO Actas de Pesca y Acuicultura*, 12: 359.
- Martínez, G., Aguilera, C., and Mettifofo, L. 2000a. Interactive effects of diet and temperature on reproductive conditioning of *Argopecten purpuratus* broodstock. *Aquaculture*, 183: 149–159.
- Martínez, G., Brokordt, K., Aguilera, C., Soto, V., and Guderley, H. 2000b. Effect of diet and temperature upon muscle metabolic capacities and biochemical composition of gonad and muscle in *Argopecten purpuratus* Lamarck 1819. *Journal of Experimental Marine Biology and Ecology*, 247: 29–49.
- Martz, T. R., Connery, J. G., and Johnson, K. S. 2010. Testing the Honeywell Durafet® for seawater pH applications. *Limnology and Oceanography: Methods*, 8: 172–184.
- Mehrbach, C., Culbertson, C. H., Hawley, J. E., and Pytkowicz, R. M. 1973. Measurement of the apparent dissociation constants of carbonic acid in seawater at atmospheric pressure. *Limnology and Oceanography*, 18: 897–907.
- Melzner, F., Thomsen, J., Koeve, W., Oschlies, A., Gutowska, M. A., Bange, H. W., Hansen, H. P., Körtzinger, A., *et al.* 2013. Future ocean acidification will be amplified by hypoxia in coastal habitats. *Marine Biology*, 160: 1875–1888.
- Mesas, A., and Tarifeño, E. 2015. Temperaturas letales superiores para el mejillón, *Mytilus galloprovincialis* (Lamarck, 1819), en la costa de Chile central. *Latin American Journal of Aquatic Research*, 43: 473–483.
- Moehler, J., Wegner, K. M., Reise, K., and Jacobsen, S. 2011. Invasion genetics of Pacific oyster *Crassostrea gigas* shaped by aquaculture stocking practices. *Journal of Sea Research*, 66: 256–262.
- Montecino, V., Astoreca, R., Paredes, M. A., and Rutllant, J. 2002. Revisiting in situ chlorophyll-*a* data along the coast in North-Central Chile considering multiscale environmental variability. *Revista Chilena de Historia Natural*, 79: 213–223.
- Murphy, J., and Riley, J. P. 1962. A modified single solution method for the determination of phosphate in natural waters. *Analytica Chimica Acta*, 27: 31–36.
- Narváez, D. A., Vargas, C. A., Cuevas, L. A., García-Loyola, S. A., Lara, C., Segura, C., Tapia, F. J., *et al.* 2019. Dominant scales of subtidal variability in coastal hydrography of the Northern Chilean Patagonia. *Journal of Marine Systems*, 193: 59–73.
- Navarro, J. M., Duarte, C., Manríquez, P. H., Lardies, M. A., Torres, R., Acuña, K., Vargas, C. A., *et al.* 2016. Ocean warming and elevated carbon dioxide: multiple stressor impact on juvenile mussels from southern Chile. *ICES Journal of Marine Science*, 73: 764–1620.
- Navarro, J. M., Torres, R., Acuña, K., Duarte, C., Manríquez, P. H., Lardies, M., Lagos, N. A., *et al.* 2013. Impact of medium-term exposure to elevated pCO<sub>2</sub> levels on the physiological energetics of the mussel *Mytilus chilensis*. *Chemosphere*, 90: 1242–1248.
- Osores, S. J. A., Lagos, N. A., San Martín, V., Manríquez, P. H., Vargas, C. A., Torres, R., Navarro, J. M., *et al.* 2017. Plasticity and inter-population variability in physiological and life-history traits of the mussel *Mytilus chilensis*: a reciprocal transplant experiment. *Journal of Experimental Marine Biology and Ecology*, 490: 1–12.
- Parsons, T. R., Maita, Y., and Lalli, C. M. 1984. *A Manual of Chemical and Biological Methods for Seawater Analysis*. Pergamon Press, Toronto.
- Pérez, C. A., DeGrandpre, M. D., Lagos, N. A., Saldías, G. S., Cascales, E. K., and Vargas, C. A. 2015. Influence of climate and land use in carbon biogeochemistry in lower reaches of rivers in central southern Chile: implications for the carbonate system in river-influenced rocky shore environments. *Journal of Geophysical Research: Biogeosciences*, 120: 673–692.
- Pérez-Santos, I., Seguel, R., Schneider, W., Linford, P., Donoso, D., Navarro, E., Amaya-Cárcamo, C., *et al.* 2019. Synoptic-scale variability of surface winds and ocean response to atmospheric forcing in the eastern austral Pacific Ocean. *Ocean Science*, 15: 1247–1266.
- Pierrot, D., Lewis, E., and Wallace, D. W. R. 2006. MS Excel Program Developed for CO<sub>2</sub> System Calculations. ORNL/CDIAC-105a. Carbon Dioxide Information Analysis Center, Oak Ridge National Laboratory, U.S. Department of Energy, Oak Ridge, TN.
- Platt, S. A., and Sanislow, C. A. 1988. Norm-of-reaction: definition and misinterpretation of animal research. *Journal of Comparative Psychology*, 102: 254–261.
- Ramajo, L., Baltanás, A., Torres, R., Manríquez, P. H., Rodríguez-Navarro, A., Lagos, N. A., Atkinson, D., *et al.* 2013. Geographical variation in shell morphology of juvenile snails (*Concholepas concholepas*) along the physical–chemical gradient of the Chilean coast. *Journal of the Marine Biological Association of the United Kingdom*, 93: 2167–2176.
- Ramajo, L., Fernández, C., Núñez, Y., Caballero, P., Lardies, M. A., and Poupin, M. J. 2019. Physiological responses of juvenile Chilean scallops (*Argopecten purpuratus*) to isolated and combined environmental drivers of coastal upwelling. *ICES Journal of Marine Science*, 76: 1836–1849.
- Ramajo, L., Marbà, N., Prado, L., Peron, S., Lardies, M. A., Rodríguez-Navarro, A. B., Vargas, C. A., *et al.* 2016. Biomineralization changes with food supply confer juvenile scallops (*Argopecten purpuratus*) resistance to ocean acidification. *Global Change Biology*, 22: 2025–2037.
- Riebesell, U., Fabry, V. J., Hansson, L., and Gattuso, J. P. 2010. *Guide to Best Practices in Ocean Acidification Research and Data Reporting*. European Commission. Publication Office of the European Union, Belgium. 260 pp.
- Rutllant, J., and Montecino, V. 2002. Multiscale upwelling forcing cycles and biological response off north-central Chile. *Revista Chilena de Historia Natural*, 75: 217–231.
- Ruiz, M., Tarifeño, E., Llanos-Rivera, A., Padgett, C., and Campos, B. 2008. Efecto de la temperatura en el desarrollo embrionario y larval del mejillón, *Mytilus galloprovincialis* (Lamarck, 1819). *Revista de Biología Marina y Oceanografía*, 43: 51–61.
- Saldías, G. S., Sobarzo, M., Largier, J., Moffat, C., and Letelier, R. 2012. Seasonal variability of turbid river plumes off central Chile based on high-resolution MODIS imagery. *Remote Sensing of Environment*, 123: 220–233.
- San Martín, V. A., Gelcich, S., Vásquez Lavín, F., Ponce Oliva, R. D., Hernández, J. I., Lagos, N. A., Birchenough, S. N. R., *et al.* 2019. Linking social preferences and ocean acidification impacts in mussel aquaculture. *Scientific Reports*, 9: 4719.
- Santos, A., Mcphaden, M. J., and Cai, W. 2017. The defining characteristics of ENSO extremes and the strong 2015/2016. *El Niño. Reviews of Geophysics*, 55: 1079–1129.
- Sernapesca 2000–2016. *Anuarios Estadísticos de Pesca 2000–2016*. Servicio Nacional de Pesca y Acuicultura, Ministerio de Economía, Fomento y Turismo, Chile.



- Sernapesca. 2018. Anuario Estadístico de Pesca 2018. Servicio Nacional de Pesca y Acuicultura, Ministerio de Economía, Fomento y Turismo, Chile.
- Silliman, K. 2019. Population structure, genetic connectivity, and adaptation in the Olympia oyster (*Ostrea lurida*) along the west coast of North America. *Evolutionary Applications*, 12: 923–939.
- Sobarzo, M., Bravo, L., Donoso, D., Garcés-Vargas, J., and Schneider, W. 2007. Coastal upwelling and seasonal cycles that influence the water column over the continental shelf off central Chile. *Progress in Oceanography*, 75: 363–382.
- Sobarzo, M., and Djurfeldt, L. 2004. Coastal upwelling process on a continental shelf limited by submarine canyons, Concepción, central Chile. *Journal of Geophysical Research: Oceans*, 109: C12012.
- Sobarzo, M., Saldías, G. S., Tapia, F. J., Bravo, L., Moffat, C., and Largier, J. L. 2016. On subsurface cooling associated with the Biobío River Canyon (Chile). *Journal of Geophysical Research: Oceans*, 121: 4568–4584.
- Thiel, M., Macaya, E. M., Acuña, E., Arntz, W. E., Bastias, H., Brokordt, K., Camus, P. A., *et al.* 2007. The Humboldt Current system of northern and central Chile. *Oceanographic processes, ecological interactions and socioeconomic feedback. Oceanography and Marine Biology Annual Review*, 45: 195–344.
- Thomsen, J., Casties, I., Pansch, C., Körtzinger, A., and Melzner, F. 2013. Food availability outweighs ocean acidification effects in juvenile *Mytilus edulis*: laboratory and field experiments. *Global Change Biology*, 19: 1017–1027.
- Thomsen, J., Gutowska, M. A., Saphörster, J., Heinemann, A., Trübenbach, K., Fietzke, J., Hiebenthal, C., *et al.* 2010. Calcifying invertebrates succeed in a naturally CO<sub>2</sub>-rich coastal habitat but are threatened by high levels of future acidification. *Biogeosciences*, 7: 3879–3891.
- Thomsen, J., and Melzner, F. 2010. Moderate seawater acidification does not elicit long-term metabolic depression in the blue mussel *Mytilus edulis*. *Marine Biology*, 157: 2667–2676.
- Thomsen, J., Stapp, L. S., Haynert, K., Schade, H., Danelli, M., Lannig, G., Wegner, M., *et al.* 2017. Naturally acidified habitat selects for ocean acidification-tolerant mussels. *Science Advances*, 3: e1602411.
- Torres, R., and Ampuero, P. 2009. Strong CO<sub>2</sub> outgassing from high nutrient low chlorophyll coastal waters off central Chile (30°S): the role of dissolved iron. *Estuarine, Coastal and Shelf Science*, 83: 126–132.
- Torres, R., Pantoja, S., Harada, N., González, H. E., Daneri, G., Frangopulos, M., Rutllant, J. A., *et al.* 2011. Air-sea CO<sub>2</sub> fluxes along the coast of Chile: from CO<sub>2</sub> outgassing in central northern upwelling waters to CO<sub>2</sub> uptake in southern Patagonian fjords. *Journal of Geophysical Research*, 116: C09006.
- Vargas, C. A., Contreras, P. Y., Pérez, C. A., Sobarzo, M., Saldías, G. S., and Salisbury, J. 2016. Influences of riverine and upwelling waters on the coastal carbonate system off Central Chile and their ocean acidification implications. *Journal of Geophysical Research: Biogeosciences*, 121: 1468–1483.
- Vargas, C. A., Lagos, N. A., Lardies, M. A., Duarte, C., Manríquez, P. H., Aguilera, V. M., and Broitman, B. 2017. Species-specific responses to ocean acidification should account for local adaptation and adaptive plasticity. *Nature Ecology and Evolution*, 1: 1–7.
- Von Brand, E., Abarca, A., Merino, G. E., and Stotz, W. 2016. Scallop Fishery and Aquaculture in Chile: a History of Developments and Declines. *Developments in Aquaculture and Fisheries Science*, 40: 1047–1072.
- Waldbusser, G. G., Hales, B., Langdon, C. J., Haley, B. A., Schrader, P., Brunner, E. L., Gray, M. W., *et al.* 2015a. Ocean acidification has multiple modes of action on bivalve larvae. *PLoS One*, 10: E0128376.
- Waldbusser, G. G., Hales, B., Langdon, C. J., Haley, B. A., Schrader, P., Brunner, E. L., Gray, M. W., *et al.* 2015b. Saturation-state sensitivity of marine bivalve larvae to ocean acidification. *Nature Climate Change*, 5: 273–280.
- Wieters, E. A., Kaplan, D. M., Navarrete, S. A., Sotomayor, A., Largier, J., Nielsen, K. J., and Véliz, F. 2003. Alongshore and temporal variability in Chlorophyll-*a* concentration in Chilean near-shore waters. *Marine Ecology Progress Series*, 249: 93–105.
- Yáñez, E., Lagos, N. A., Norambuena, R., Silva, C., Letelier, J., Muck, K. P., San Martín, G., *et al.* 2017. Impacts of climate change on marine fisheries and aquaculture in Chile. *In Climate Change Impacts on Fisheries and Aquaculture: A Global Analysis*, 1, 1st edn, pp. 239–332. Ed. by B. F. Phillips and M. and Pérez-Ramírez. John Wiley & Sons Ltd, Hoboken, NJ, USA. 1048 pp.

Handling editor: Silvana Birchenough
